# Supplementary material for: An experimental and theoretical study on the electrostatic effect of an appended cationic group on electronic properties of aromatic systems
Source: Royal Society of Chemistry journal article supplement (doi:10.1039/b709751d), 2007-01-01
Supplement: b709751d.pdf [file b709751d.pdf]

# An experimental and theoretical study on the electrostatic effect of an appended cationic group on electronic properties of aromatic systems

**Viviana Grosso, Carlos Previtali and Carlos A. Chesta\***

Departamento de Química, Universidad Nacional de Río Cuarto

**D. Mariano A. Vera\* and Adriana B. Pierini\***

INFIQC, Departamento de Química Orgánica. Facultad de Ciencias Químicas, Universidad Nacional de Córdoba

## ***Electronic Supporting Information (ESI). Supplementary Material***

---

### **Table of Contents**

|                                                                                                                                                                                                   |    |
|---------------------------------------------------------------------------------------------------------------------------------------------------------------------------------------------------|----|
| Electronic Supporting Information (ESI). Supplementary Material.....                                                                                                                              | 1  |
| Part 1. Experimental.....                                                                                                                                                                         | 2  |
| Supplementary figures to the experimental section.....                                                                                                                                            | 2  |
| Part 2. Computational Supplementary Material.....                                                                                                                                                 | 3  |
| 2.1 Koopmans theorem (KT) estimation to the vertical ionization potentials (I) and electron affinities (EA).....                                                                                  | 3  |
| 2.2. Whole conformers of the molecules and models used for evaluating the shifts in the gas phase donor/acceptor capabilities of the chromophores.....                                            | 6  |
| 2.3. Shifts on the orbital energies in acetonitrile.....                                                                                                                                          | 11 |
| 2.4. DFT thermodynamic calculations for the shortest chain derivatives. Total energies in atomic units for each substrate and oxidized/reduced product both in gas phase and in acetonitrile..... | 11 |
| 2.5 NBO analysis details.....                                                                                                                                                                     | 12 |
| 2.6 Cartesian coordinates of main compounds .....                                                                                                                                                 | 14 |

## Part 1. Experimental

### Supplementary figures to the experimental section

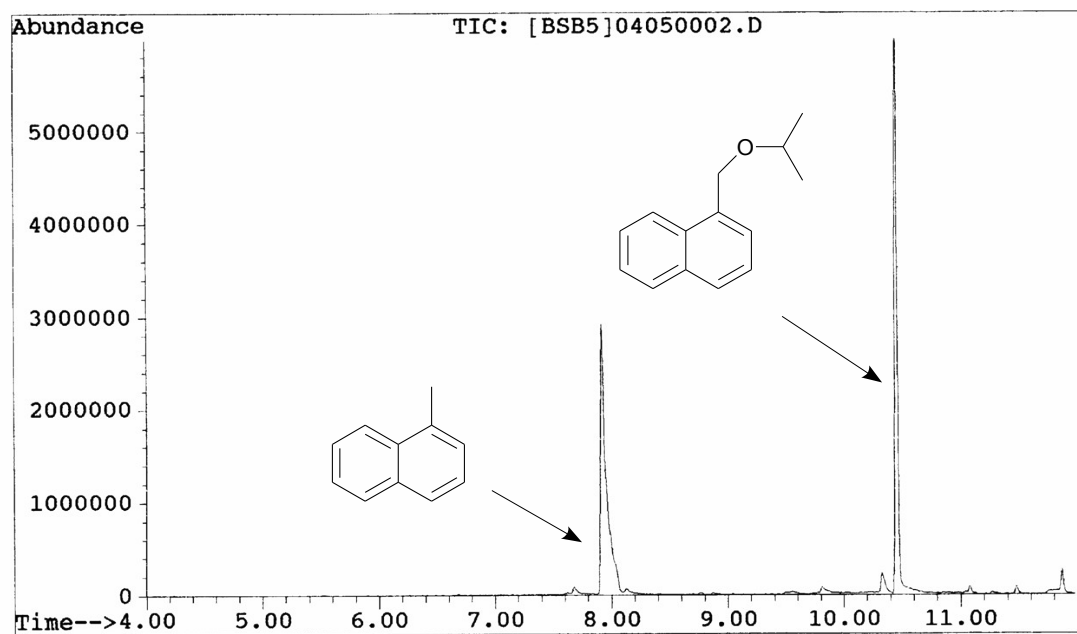

Figure S1. GC-mass chromatogram of a solution of **c1Naph** ( $1 \times 10^{-3}$  M) in acetonitrile/2-propanol (9:1) after photolysis at 310 nm. Photoproducts were identified by comparison of the mass spectra of those of the authentic compounds. Photoreaction in the absence of the alcohol gave 1-methylnaphthalene and a large number of identified products

## Part 2. Computational Supplementary Material

### 2.1 Koopmans theorem (KT) estimation to the vertical ionization potentials ( $I$ ) and electron affinities ( $E_A$ )

As a first estimate to the actual change in the donor/acceptor capabilities of the aromatics systems in the absence of solvent, the KT values were discussed in the text. The following correlation between KT values and the experimental ones, for a family of compounds structurally related to our aromatics and **cnAr** family, with known  $I$ 's and  $E_A$ 's, were computed. The good linear correlation (correlation indexes of 0.981 and 0.984) and the values of the slopes obtained (-0.93 and -0.83), which are close to 1, indicate that the shifts from  $\Delta\epsilon(\text{HOMO})$  and  $\Delta\epsilon(\text{LUMO})$  are reasonably good estimations to the  $\Delta I$ 's and  $\Delta E_A$ 's, respectively. Further highly correlated DFT thermodynamic calculations, by computing the total energy of the neutral, anionic and cationic species in each case, are also in agreement with these estimations, as checked for the shortest chain derivatives (see main text). The results for the aromatics species on Chart S1 are summarized in Table S1 and Figure S3.

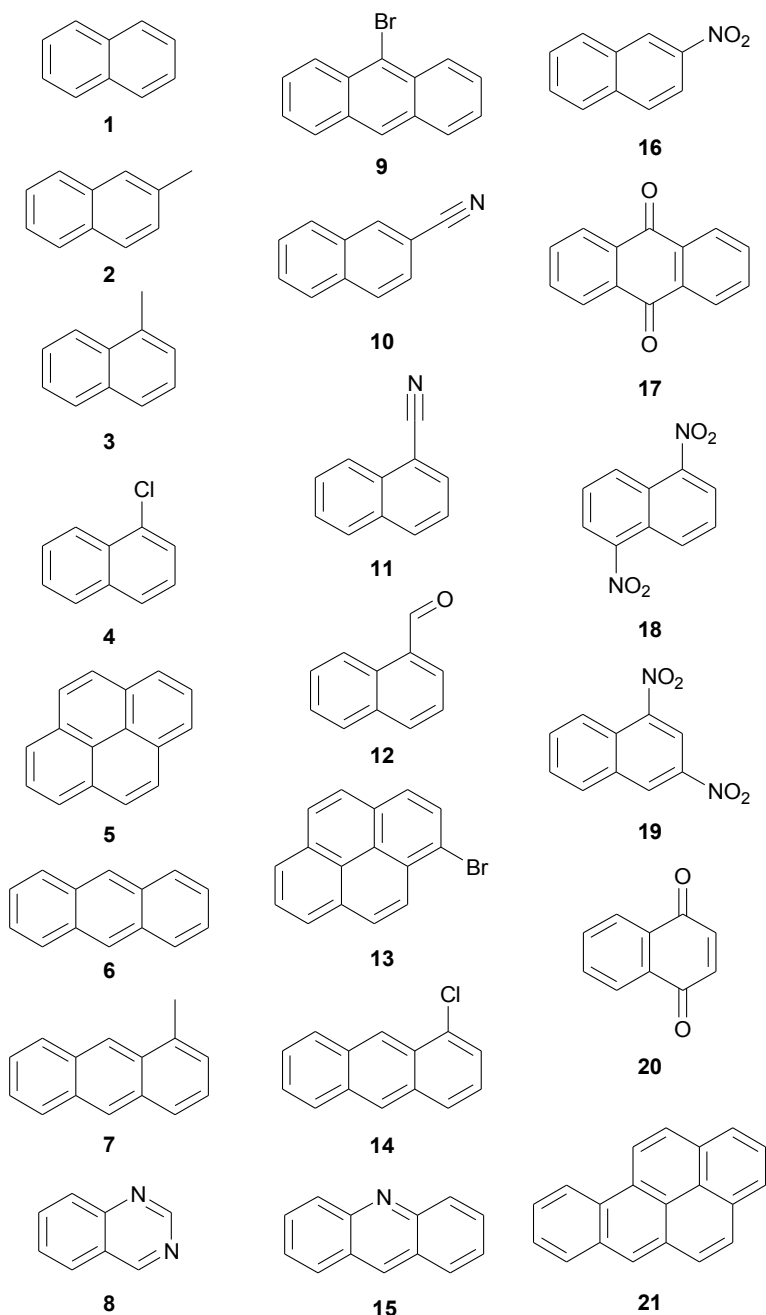

Chart S1

**Table S1.** Linear correlation between the experimental  $I$ 's and  $E_A$ 's and HOMO and LUMO energies at the HF/6-31G\* level

| For ionization potentials |                   |                         |                                                                                                                                                                                                                                                                                                                              |
|---------------------------|-------------------|-------------------------|------------------------------------------------------------------------------------------------------------------------------------------------------------------------------------------------------------------------------------------------------------------------------------------------------------------------------|
| Compound<br>(Chart S1)    | HOMO<br>energy/eV | $I$ , experim.<br>/eV   | Reference                                                                                                                                                                                                                                                                                                                    |
| 1                         | -7.805            | 8.145                   | Cockett, M.C.R.; Ozeki, H.; Okuyama, K.; Kimura, K., <i>J. Chem. Phys.</i> , 1993, <b>98</b> , 7763.                                                                                                                                                                                                                         |
| 2                         | -7.680            | 7.850                   | a) Klasinc, L.; Kovac, B.; Gusten, H., <i>Pure Appl. Chem.</i> , 1983, <b>55</b> , 289. b) Schafer, W.; Schweig, A.; Vermeer, H.; Bickel-haupt, F.; De Graaf, H., <i>J. Electron Spectrosc. Relat. Phenom.</i> , 1975, <b>6</b> , 91. c) Klasinc, L.; Kovac, B.; Gusten, H., <i>Pure Appl. Chem.</i> , 1983, <b>55</b> , 289 |
| 3                         | -7.685            | 7.900                   | Gotkis, I.; Lifshitz, C., <i>Org. Mass Spectrom.</i> , 1993, <b>28</b> , 372                                                                                                                                                                                                                                                 |
| 4                         | -8.034            | 8.130                   | Klasinc, L.; Kovac, B.; Gusten, H., <i>Pure Appl. Chem.</i> , 1983, <b>55</b> , 289                                                                                                                                                                                                                                          |
| 5                         | -7.040            | 7.500                   | Mautner, M., <i>J. Phys. Chem.</i> , 1980, <b>84</b> , 2716                                                                                                                                                                                                                                                                  |
| 6                         | -6.896            | 7.436                   | a) Hager, J.W.; Wallace, S.C., <i>Anal. Chem.</i> , 1988, <b>60</b> , 5. b) Stahl, D.; Maquin, F., <i>Chem. Phys. Lett.</i> , 1984, <b>108</b> , 613. c) Klasinc, L.; Kovac, B.; Gusten, H., <i>Pure Appl. Chem.</i> , 1983, <b>55</b> , 289. Average                                                                        |
| 8                         | -8.829            | 9.010                   | a) Brogli, F.; Heilbronner, E.; Kobayashi, T., <i>Helv. Chim. Acta</i> , 1972, <b>55</b> , 274 b) Dewar, M.J.S.; Worley, S.D., <i>J. Chem. Phys.</i> , 1969, <b>51</b> , 263.                                                                                                                                                |
| 9                         | -7.080            | 7.530                   | Klasinc, L.; Kovac, B.; Gusten, H., <i>Pure Appl. Chem.</i> , 1983, <b>55</b> , 289                                                                                                                                                                                                                                          |
| 10                        | -8.437            | 8.600                   | a) Klasinc, L.; Kovac, B.; Gusten, H., <i>Pure Appl. Chem.</i> , 1983, <b>55</b> , 289. b) Utsunomiya, C.; Kobayashi, T.; Nagakura, S., <i>Bull. Chem. Soc. Jpn.</i> , 1975, <b>48</b> , 1852. Average                                                                                                                       |
| 11                        | -8.394            | 8.600                   | a) Klasinc, L.; Kovac, B.; Gusten, H., <i>Pure Appl. Chem.</i> , 1983, <b>55</b> , 289. b) Utsunomiya, C.; Kobayashi, T.; Nagakura, S., <i>Bull. Chem. Soc. Jpn.</i> , 1975, <b>48</b> , 1852. Average                                                                                                                       |
| 12                        | -8.158            | 8.330                   | Wentworth, W.E.; Kao, L.W.; Becker, R.S., <i>J. Phys. Chem.</i> , 1975, <b>79</b> , 1161                                                                                                                                                                                                                                     |
| 15                        | -7.625            | 7.800                   | Jongsma, C.; Vermeer, H.; Bickelhaupt, F.; Schafer, W.; Schweig, A., <i>Tetrahedron</i> , 1975, <b>31</b> , 2931                                                                                                                                                                                                             |
| 16                        | -8.577            | 8.650                   | a) Klasinc, L.; Kovac, B.; Gusten, H., <i>Pure Appl. Chem.</i> , 1983, <b>55</b> , 289. b) Kotov, B.V.; Potapov, V.K., <i>Khim. Vys. Energ.</i> , 1972, <b>6</b> , 375. Average                                                                                                                                              |
| 20                        | -9.671            | 9.660                   | Redchenko, V.V.; Freimanis, Y.F.; Dregeris, Y.Y., <i>J. Gen. Chem. USSR</i> , 1980, <b>50</b> , 1507                                                                                                                                                                                                                         |
| 21                        | -6.742            | 7.110                   | a) Clar, E.; Schmidt, W., <i>Tetrahedron</i> , 1979, <b>35</b> , 1027. b) Akiyama, I.; Li, K.C.; LeBreton, P.R.; Fu, P.P.; Harvey, R.G., <i>J. Phys. Chem.</i> , 1979, <b>83</b> , 2997.                                                                                                                                     |
| For electron affinities   |                   |                         |                                                                                                                                                                                                                                                                                                                              |
| Compound<br>(Chart S1)    | LUMO<br>energy/eV | $E_A$ , experim.<br>/eV | Reference                                                                                                                                                                                                                                                                                                                    |
| 1                         | 2.815             | -0.200                  | a) Jordan, K.D.; Burrow, P.D.; <i>Acc. Chem. Res.</i> 1978, <b>11</b> , 341. b) Lyapustina, S.A.; Xu, S.K.; Nilles, J.M.; Bowen, K.H., <i>J. Chem. Phys.</i> , 2000, <b>112</b> , 6643 c) Schiedt, J.; Knott, W.J.; Le Barbu, K.; Schlag, E.W.; Weinkauff, R., <i>J. Chem. Phys.</i> , 2000, <b>113</b> , 9470.              |
| 4                         | 2.438             | 0.277                   | Steelhammer, J.C.; Wentworth, W.E., <i>J. Chem. Phys.</i> , 1969, <b>51</b> , 1802                                                                                                                                                                                                                                           |
| 5                         | 2.029             | 0.494                   | a) Lyons, L.E.; Morris, G.C.; Warren, L.J., <i>J. Phys. Chem.</i> , 1968, <b>72</b> , 3677. b) Becker, R.S.; Chen, E., <i>J. Chem. Phys.</i> , 1966, <b>45</b> , 2403. c) Wentworth, W.E.; Becker, R.S., <i>J. Am. Chem. Soc.</i> , 1962, <b>84</b> , 4263. Average                                                          |
| 6                         | 1.761             | 0.597                   | a) Heinis, T.; Chowdhury, S.; Kebarle, P., <i>Org. Mass Spectrom.</i> , 1993, <b>28</b> , 358 b) Scheidt, J.; Weinkauff, R., <i>Chem. Phys. Lett.</i> , 1997, <b>266</b> , 201 c) Ruoff, R.S.; Kadish, K.M.; Boulas, P.; Chen, E.C.M., <i>J. Phys. Chem.</i> , 1995, <b>99</b> , 8843                                        |
| 7                         | 1.955             | 0.550                   | Chen, G.D.; Cooks, R.G., <i>J. Mass Spectrom.</i> , 1995, <b>30</b> , 1167                                                                                                                                                                                                                                                   |
| 8                         | 2.058             | 0.570                   | Dillow, G.W.; Kebarle, P., <i>Can. J. Chem.</i> , 1989, <b>67</b> , 1628.                                                                                                                                                                                                                                                    |
| 10                        | 1.877             | 0.650                   | Heinis, T.; Chowdhury, S.; Kebarle, P., <i>Org. Mass Spectrom.</i> , 1993, <b>28</b> , 358                                                                                                                                                                                                                                   |
| 11                        | 1.801             | 0.676                   | Heinis, T.; Chowdhury, S.; Kebarle, P., <i>Org. Mass Spectrom.</i> , 1993, <b>28</b> , 358                                                                                                                                                                                                                                   |
| 12                        | 1.832             | 0.681                   | Heinis, T.; Chowdhury, S.; Kebarle, P., <i>Org. Mass Spectrom.</i> , 1993, <b>28</b> , 358                                                                                                                                                                                                                                   |
| 13                        | 1.718             | 0.720                   | Chen, G.D.; Cooks, R.G., <i>J. Mass Spectrom.</i> , 1995, <b>30</b> , 1167                                                                                                                                                                                                                                                   |
| 14                        | 1.648             | 0.828                   | Heinis, T.; Chowdhury, S.; Kebarle, P., <i>Org. Mass Spectrom.</i> , 1993, <b>28</b> , 358                                                                                                                                                                                                                                   |
| 15                        | 1.567             | 0.906                   | Kokubo, S.; Ando, N.; Koyasu, K.; Mitsui, M.; Nakajima, A., <i>J. Chem. Phys.</i> , 2004, <b>121</b> , 11112.                                                                                                                                                                                                                |
| 16                        | 1.392             | 1.184                   | Heinis, T.; Chowdhury, S.; Kebarle, P., <i>Org. Mass Spectrom.</i> , 1993, <b>28</b> , 358                                                                                                                                                                                                                                   |
| 17                        | 0.939             | 1.591                   | Heinis, T.; Chowdhury, S.; Scott, S.L.; Kebarle, P., <i>J. Am. Chem. Soc.</i> , 1988, <b>110</b> , 400                                                                                                                                                                                                                       |
| 18                        | 0.752             | 1.765                   | Heinis, T.; Chowdhury, S.; Kebarle, P., <i>Org. Mass Spectrom.</i> , 1993, <b>28</b> , 358                                                                                                                                                                                                                                   |
| 19                        | 0.583             | 1.782                   | Heinis, T.; Chowdhury, S.; Kebarle, P., <i>Org. Mass Spectrom.</i> , 1993, <b>28</b> , 358                                                                                                                                                                                                                                   |
| 20                        | 0.753             | 1.800                   | Fukuda, E.K.; McIver, R.T., Jr., <i>J. Am. Chem. Soc.</i> , 1985, <b>107</b> , 2291                                                                                                                                                                                                                                          |
| 21                        | 1.704             | 0.815                   | Crocker, L.; Wang, T.B.; Kebarle, P., <i>J. Am. Chem. Soc.</i> , 1993, <b>115</b> , 7818                                                                                                                                                                                                                                     |

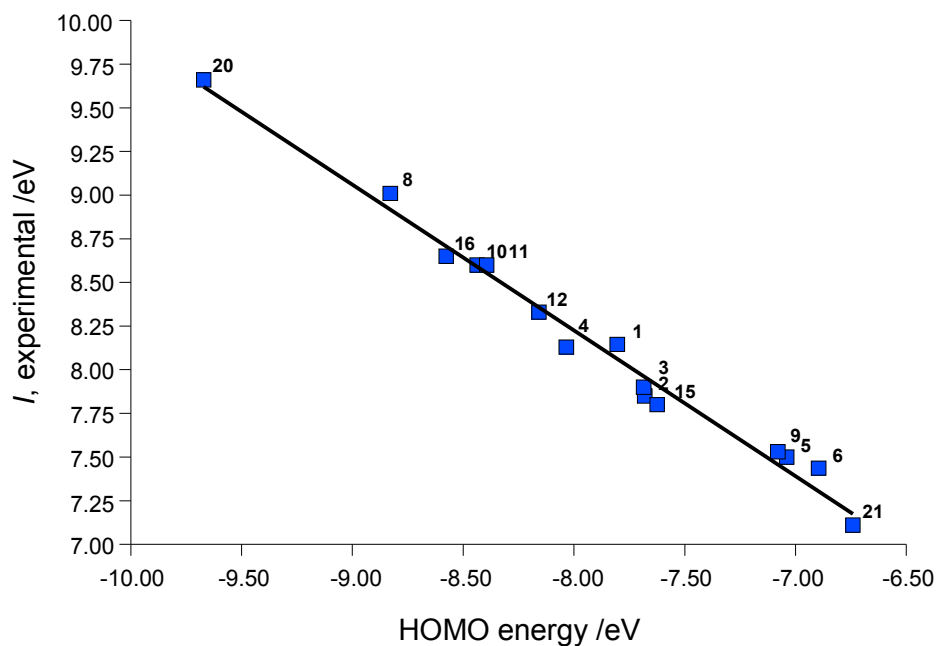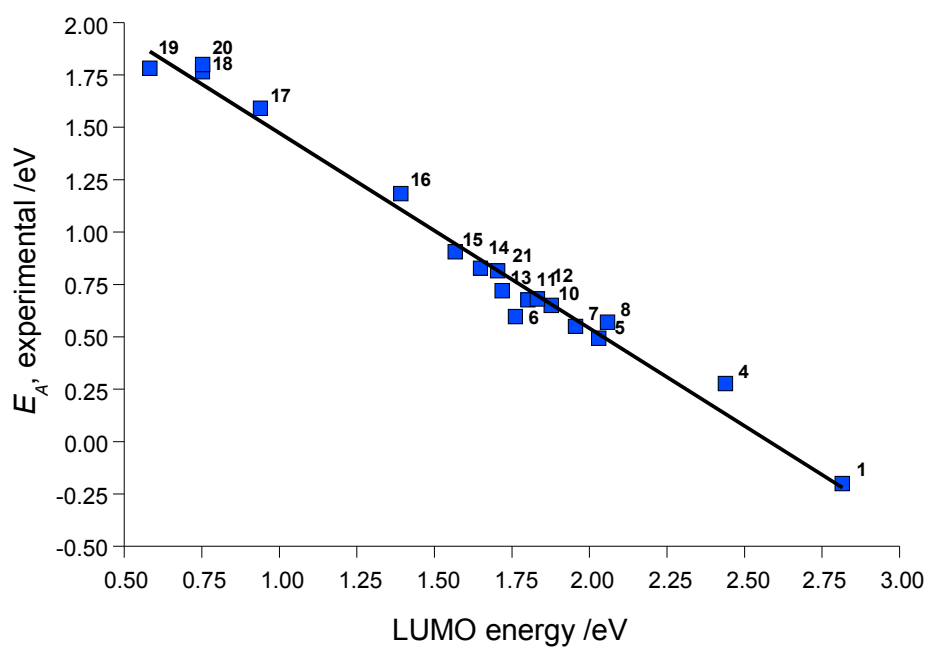

Figure S2. Correlation between experimental ionization potentials (top) and electron affinities (bottom) and their KT values for the set of compounds on Chart S1.

## 2.2. Whole conformers of the molecules and models used for evaluating the shifts in the gas phase electronic properties of the chromophores.

**Pyrene derivatives.** The **MePy** was exposed to a single point charge of +0.6 and +0.7 a.u. approaching the chromophore along an axis lying either on the plane or above the plane of the pyrene, with the same orientation found in the totally gauche and in the plane,  $C_s$ , conformers of the actual **cnPy** molecules, respectively, as shown in Figure S3.

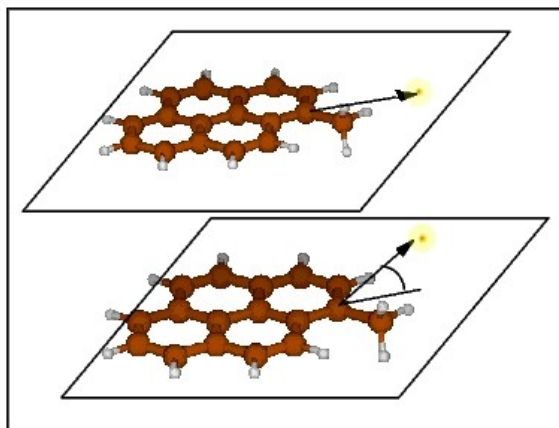

Figure S3: **MePy** exposed to a non bonded charge along the axis of the alkyl chain of the totally gauche ( $C_1$ ) and plane ( $C_s$ ) conformers

The shifts were not sensitively affected by these two different orientation, in contrast to the high sensitivity to the charge magnitude and distance. The results for these models are summarized together with the ones discussed on the main text on figure S4.

The whole summary of the shifts in the orbitals for the external (non bonded) charge models and for the actual **cnPy** different conformations are summarized on table S2.

**Naphthalene derivatives.** The complete summary of results for the naphthalene derivatives are shown on table S3.

Details on the changes in the total energies of the species and the changes in the shifts observed as a function of the dihedral  $\theta$ , where the rotation about  $\theta$  transforms the  $C_s$  into the  $C_1$  conformer (0 to 90 degrees), are shown on Figure S5 for **c1Naph**.

| Table S2. Summary of the shifts calculated in gas phase for the pyrene series. <sup>a</sup>  |                                                                                        |                  |                         |                         |                               |                               |       |
|----------------------------------------------------------------------------------------------|----------------------------------------------------------------------------------------|------------------|-------------------------|-------------------------|-------------------------------|-------------------------------|-------|
|                                                                                              |                                                                                        | $r / \text{\AA}$ | $\epsilon(\text{HOMO})$ | $\epsilon(\text{LUMO})$ | $\Delta\epsilon(\text{HOMO})$ | $\Delta\epsilon(\text{LUMO})$ |       |
| species                                                                                      | <b>MePy</b>                                                                            | 6.80             | -6.93                   | 2.04                    | 0.00                          | 0.00                          |       |
|                                                                                              | <b>C1Py</b>                                                                            | 1.68             | -9.91                   | -1.10                   | -2.98                         | -3.14                         |       |
|                                                                                              | <b>C4Py</b>                                                                            | 5.17             | -8.74                   | 0.22                    | -1.81                         | -1.82                         |       |
| Cs Conformers                                                                                | <b>C1Py</b>                                                                            | 1.68             | -9.69                   | -0.87                   | -2.77                         | -2.91                         |       |
|                                                                                              | <b>C4Py</b>                                                                            | 5.17             | -8.64                   | 0.28                    | -1.71                         | -1.76                         |       |
| Models MePy + array of charges fitting the electrostatic potential of the TAA group          |                                                                                        | 5.17             | -8.11                   | 0.83                    | -1.18                         | -1.21                         |       |
|                                                                                              |                                                                                        | 1.70             | -8.70                   | 0.22                    | -1.77                         | -1.82                         |       |
| MePy + single point charge                                                                   | charge /a. u.                                                                          |                  |                         |                         |                               |                               |       |
| above the pyrene plane, along the axis of the chain of the <b>c1Py</b> and <b>c4Py</b> salts | 0.59                                                                                   | 1.70             | -8.78                   | 0.09                    | -1.85                         | -1.95                         |       |
|                                                                                              |                                                                                        | 2.50             | -8.52                   | 0.40                    | -1.59                         | -1.64                         |       |
|                                                                                              |                                                                                        | 3.50             | -8.27                   | 0.68                    | -1.34                         | -1.36                         |       |
|                                                                                              |                                                                                        | 5.17             | -7.94                   | 1.02                    | -1.01                         | -1.02                         |       |
|                                                                                              | 0.69                                                                                   | 1.70             | -9.08                   | -0.25                   | -2.15                         | -2.29                         |       |
|                                                                                              |                                                                                        | 2.50             | -8.77                   | 0.12                    | -1.85                         | -1.92                         |       |
|                                                                                              |                                                                                        | 3.50             | -8.49                   | 0.45                    | -1.56                         | -1.59                         |       |
|                                                                                              |                                                                                        | 5.17             | -8.10                   | 0.85                    | -1.17                         | -1.19                         |       |
|                                                                                              | on the plane of pyrene, along the axis of the chain of the Cs conformers of the salts. | 0.59             | 1.70                    | -8.80                   | 0.13                          | -1.87                         | -1.91 |
|                                                                                              |                                                                                        |                  | 2.50                    | -8.49                   | 0.46                          | -1.56                         | -1.59 |
| 3.50                                                                                         |                                                                                        |                  | -8.26                   | 0.69                    | -1.33                         | -1.35                         |       |
| 5.17                                                                                         |                                                                                        |                  | -7.96                   | 1.00                    | -1.03                         | -1.04                         |       |

a) All energies in eV

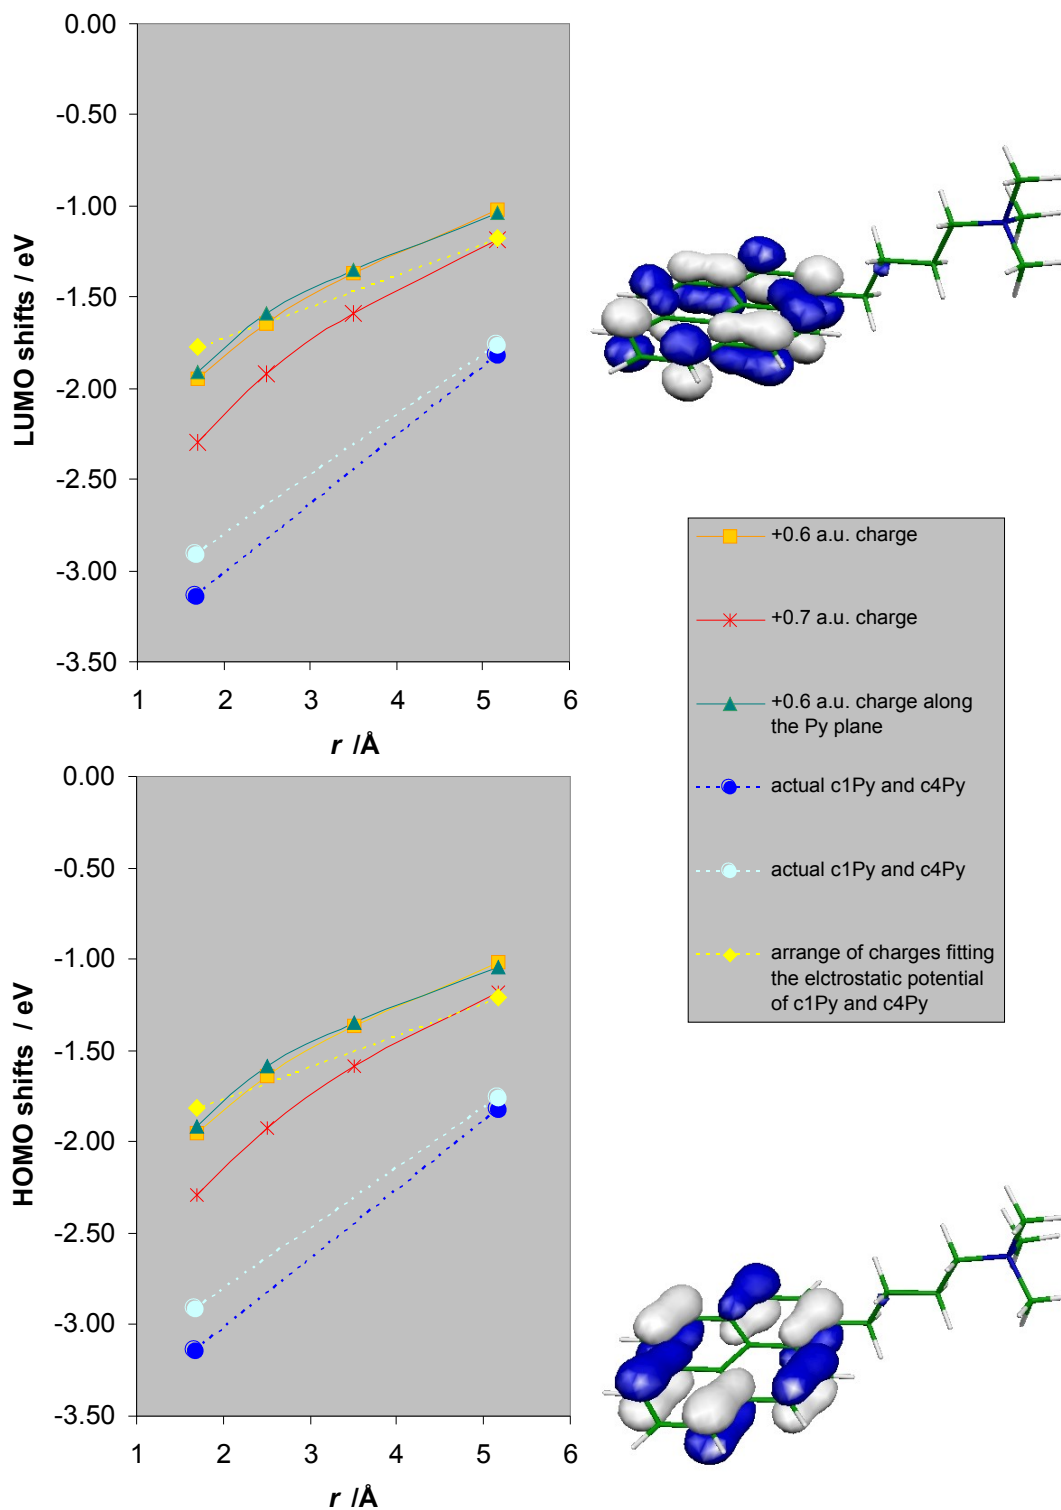

Figure S4: Summary of chromophore – external (non bonded) electric field obtained for the pyrene derivatives.



**Table S3.** Summary of results obtained for the naphthalene series in gas phase.<sup>a</sup>

| species or models                                                                                                                                                                           | distance cromophore-charged group in numbers of methylenes -CH <sub>2</sub> - | $\varepsilon(\pi)$ /eV | $\varepsilon(\pi^*)$ /eV | $\Delta\varepsilon(\pi)$ /eV | $\Delta\varepsilon(\pi^*)$ /eV |
|---------------------------------------------------------------------------------------------------------------------------------------------------------------------------------------------|-------------------------------------------------------------------------------|------------------------|--------------------------|------------------------------|--------------------------------|
| <b>MeNaph</b>                                                                                                                                                                               |                                                                               | -7.69                  | 2.83                     | 0.00                         | 0.00                           |
| <b>c1Naph</b>                                                                                                                                                                               | 1                                                                             | -11.09                 | -0.78                    | -3.40                        | -3.61                          |
| <b>c1Naph</b> , Cs conformer                                                                                                                                                                | 1                                                                             | -10.92                 | -0.50                    | -3.23                        | -3.33                          |
| <b>MeNaph</b> + array of charges equivalent to the field of the TAA group in the <b>c1Naph</b> species                                                                                      | 1                                                                             | -9.70                  | 0.81                     | -2.01                        | -2.01                          |
| <b>c7Naph</b> folded                                                                                                                                                                        | <2                                                                            | -10.21                 | 0.24                     | -2.52                        | -2.59                          |
| <b>c8Naph</b> folded                                                                                                                                                                        | <2                                                                            | -10.30                 | 0.14                     | -2.61                        | -2.69                          |
| <b>c2Naph</b>                                                                                                                                                                               | 2                                                                             | -10.50                 | -0.06                    | -2.81                        | -2.89                          |
| <b>c2Naph</b> , Cs conformer                                                                                                                                                                | 2                                                                             | -10.38                 | 0.12                     | -2.69                        | -2.71                          |
| <b>c3Naph</b>                                                                                                                                                                               | 3                                                                             | -10.07                 | 0.41                     | -2.38                        | -2.42                          |
| <b>c4Naph</b>                                                                                                                                                                               | 4                                                                             | -9.71                  | 0.76                     | -2.02                        | -2.07                          |
| <b>c4Naph</b> , Cs conformer                                                                                                                                                                | 4                                                                             | -9.67                  | 0.84                     | -1.98                        | -1.99                          |
| <b>MeNaph</b> + array of charges fitting the electrostatic potential of the TAA group in the <b>c4Naph</b> species                                                                          | 4                                                                             | -8.97                  | 1.55                     | -1.28                        | -1.28                          |
| <b>MeNaph</b> + array of charges fitting the electrostatic potential of the TAA group in the <b>c4Naph</b> species, including the polarized -(CH <sub>2</sub> ) <sub>4</sub> - alkyl bridge | 4                                                                             | -9.63                  | 0.89                     | -1.94                        | -1.93                          |
| <b>c7Mnaf</b>                                                                                                                                                                               | 7                                                                             | -9.05                  | 1.45                     | -1.36                        | -1.38                          |
| <b>MeNaph</b> + single point charge (+1.0) at the position of the N atom of the TAA in <b>c7Naph</b> salt (at 10.29Å)                                                                       | 7                                                                             | -8.95                  | 1.57                     | -1.27                        | -1.26                          |
| <b>c8Mnaf</b>                                                                                                                                                                               | 8                                                                             | -8.90                  | 1.60                     | -1.21                        | -1.23                          |
| <b>c10Mnaf</b>                                                                                                                                                                              | 10                                                                            | -8.68                  | 1.82                     | -0.99                        | -1.01                          |
| 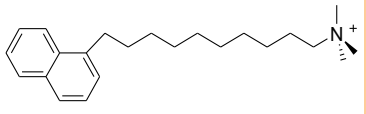                                                                                                         |                                                                               |                        |                          |                              |                                |
| point charge +1.0 + <b>MeNaph</b>                                                                                                                                                           | 10                                                                            | -8.64                  | 1.88                     | -0.95                        | -0.95                          |
|                                                                                                          |                                                                               |                        |                          |                              |                                |
| point charge +1.0 + 2- <i>n</i> -nonyl-naphthalene                                                                                                                                          | 10                                                                            | -8.70                  | 1.79                     | -1.02                        | -1.04                          |
|                                                                                                          |                                                                               |                        |                          |                              |                                |
| Point charge +1.0 +(9-trimethyl)-nonyl-naphthalene                                                                                                                                          | 10                                                                            | -8.67                  | 1.82                     | -0.99                        | -1.01                          |
|                                                                                                          |                                                                               |                        |                          |                              |                                |
| <b>C16Naph</b>                                                                                                                                                                              | 16                                                                            | -8.32                  | 2.18                     | -0.63                        | -0.65                          |
| point charge +1.0 + <b>MeNaph</b>                                                                                                                                                           | 16                                                                            | -8.32                  | 2.20                     | -0.63                        | -0.63                          |

a) all energies in eV

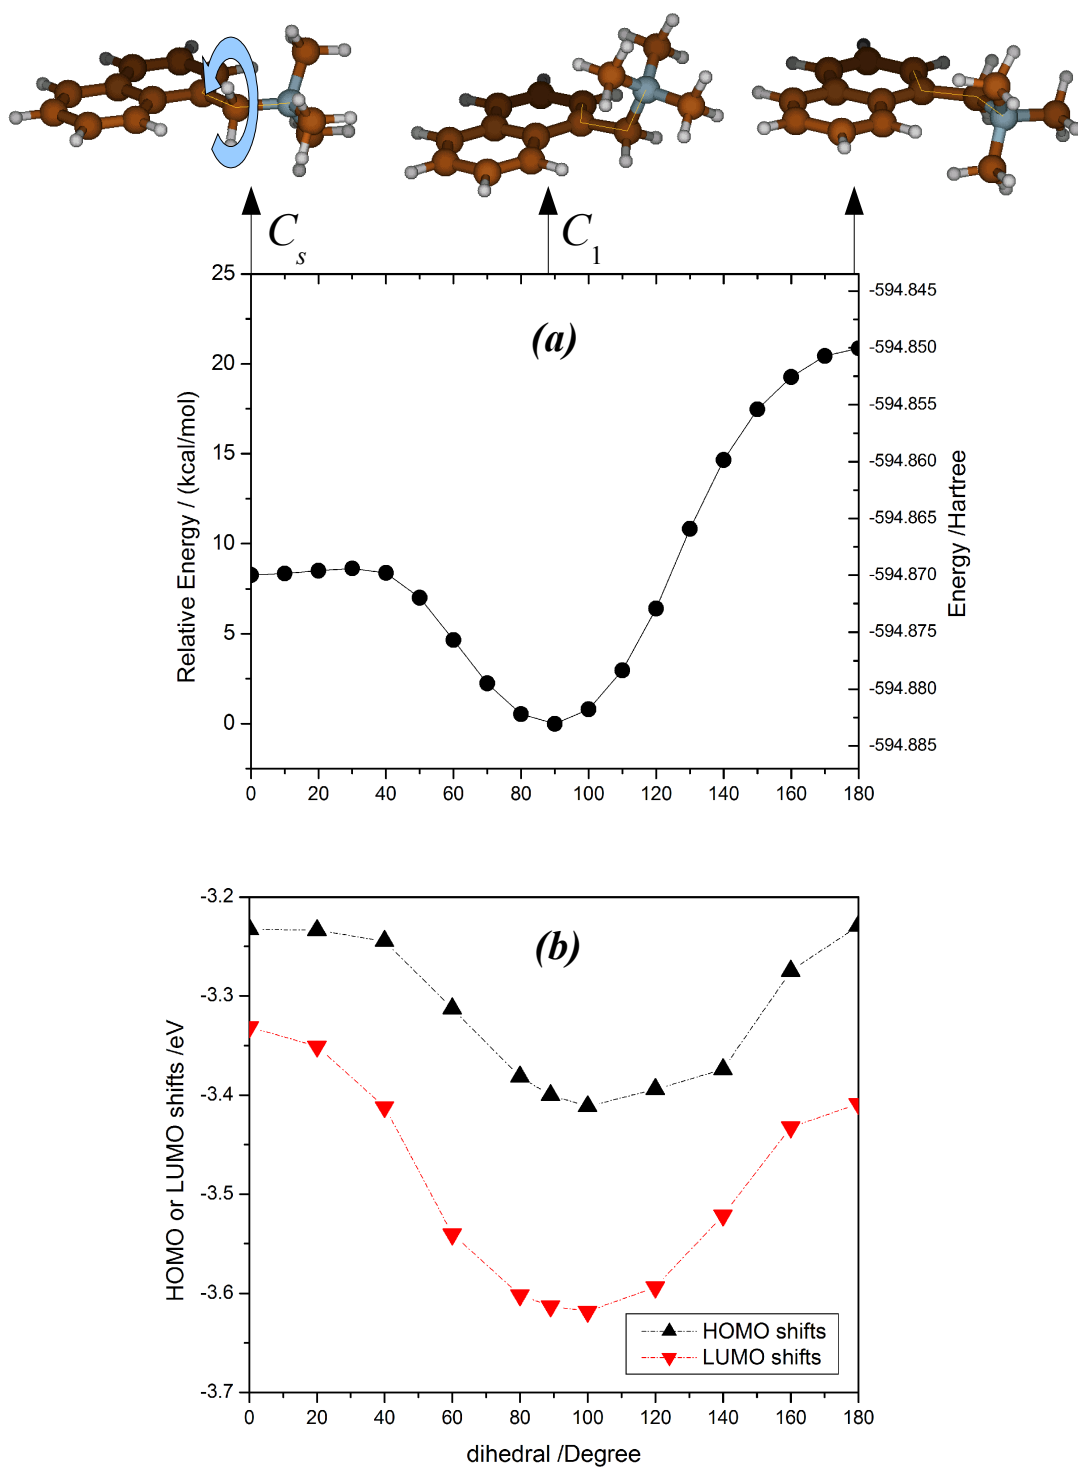

Figure S5: Energy profile (a), and changes in the HOMO and LUMO shifts (b), as a function of the selected dihedral, which interconverts plane and  $C_1$  conformers.

### 2.3. Shifts on the orbital energies in acetonitrile.

**Table S4.** Summary of the shifts calculated in acetonitrile. <sup>a</sup>

|                                  | $\epsilon(\text{HOMO})$ | $\epsilon(\text{LUMO})$ | $\Delta\epsilon(\text{HOMO})$ | $\Delta\epsilon(\text{LUMO})$ |
|----------------------------------|-------------------------|-------------------------|-------------------------------|-------------------------------|
| <b>Mepy</b>                      | -7.051                  | 1.917                   | 0.000                         | 0.000                         |
| <b>c1Py</b>                      | -7.575                  | 1.306                   | -0.524                        | -0.611                        |
| <b>c4Py</b>                      | -7.150                  | 1.815                   | -0.099                        | -0.102                        |
| <b>MeNaph</b>                    | -7.782                  | 2.736                   | 0.000                         | 0.000                         |
| <b>c1Naph</b>                    | -8.432                  | 1.949                   | -0.650                        | -0.786                        |
| <b>c1Naph</b> ( $C_s$ conformer) | -8.360                  | 2.132                   | -0.579                        | -0.604                        |
| <b>c2Naph</b>                    | -8.150                  | 2.325                   | -0.369                        | -0.410                        |
| <b>c2Naph</b> ( $C_s$ conformer) | -8.101                  | 2.435                   | -0.319                        | -0.300                        |
| <b>c3Naph</b>                    | -7.978                  | 2.514                   | -0.196                        | -0.221                        |
| <b>c4Naph</b>                    | -7.870                  | 2.622                   | -0.088                        | -0.114                        |
| <b>c4Naph</b> ( $C_s$ conformer) | -7.889                  | 2.643                   | -0.107                        | -0.093                        |

a) At the HF/6-31G\* level, all energies in eV

### 2.4. DFT thermodynamic calculations for the shortest chain derivatives. Total energies in atomic units for each substrate and oxidized/reduced product both in gas phase and in acetonitrile.

**Table S5.** Supplementary information to main text Table 2: B3LYP Total energies for all species on the thermodynamic cycles on Chart2.

|                          | gas phase    | Ar or Salt | (Ar) <sup>-</sup> or (salt) <sup>-</sup> | (Ar) <sup>+</sup> or (salt) <sup>+</sup> |
|--------------------------|--------------|------------|------------------------------------------|------------------------------------------|
| <b>MeNaph</b>            |              | -425.22428 | -425.21116                               | -424.94070                               |
| <b>c1Naph</b>            |              | -598.87564 | -598.99638                               | -598.46943                               |
| <b>MePy</b>              |              | -655.10924 | -655.12061                               | -654.85195                               |
| <b>c1Py</b> <sup>b</sup> |              | -828.76381 | -828.89138                               | -828.39916                               |
| <b>MePy</b> <sup>b</sup> |              | -655.26107 | -655.27497                               | -655.00232                               |
| <b>c1Py</b>              |              | -828.96125 | -829.09119                               | -828.59526                               |
| <b>MeAnt</b>             |              | -578.86063 | -578.87681                               | -578.60541                               |
| <b>c1Ant</b>             |              | -870.45202 | -870.58670                               | -870.08520                               |
|                          | Acetonitrile |            |                                          |                                          |
| <b>MeNaph</b>            |              | -425.21997 | -425.27122                               | -424.99500                               |
| <b>c1Naph</b>            |              | -598.92935 | -599.00486                               | -598.68084                               |
| <b>MePy</b>              |              | -655.10482 | -655.17617                               | -654.89975                               |
| <b>c1Py</b>              |              | -828.81446 | -828.90437                               | -828.59150                               |
| <b>MeAnt</b>             |              | -578.85552 | -578.93205                               | -578.65362                               |
| <b>c1Ant</b>             |              | -870.49034 | -870.58923                               | -870.26982                               |

a) B3LYP/6-31+G\* All energies in Hartree; b) B3LYP/6-311++G(2d,p)//B3LYP/6-31+G\*

## 2.5 NBO analysis details

An alternative evaluation of the importance of the orbital coupling between the chromophore  $\pi$  system, the bridge and the TAA group is shown for the **c1Naph** species, for which the effect is expected to be maximum. The actual **c1Naph** molecule, *i.e.* the unaltered Fock matrix, has been compared to different models in which specific interactions between natural bonding orbitals with high and low occupancy have been suppressed by setting their non-diagonal Fock matrix elements (in NBO basis) to zero; in NBO terminology, the comparison of the system before and after specific *deletions*.<sup>30</sup> **c1Naph** has been compared to three models which have been setup by deleting:

- I. The direct, “through space” interactions between the chromophore and the TAA group, *i.e.* setting to zero the non-diagonal elements involving the bonding and antibonding  $\pi$  orbitals with the antibonding and bonding  $\sigma$  orbitals respectively, of the TAA

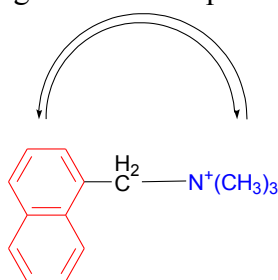

- II. The above deletions (I) plus the interaction between the chromophore and the -CH<sub>2</sub>-bridge and with the TAA group. As previously, each deletion involves a couple of a highly occupied bonding orbital with a slightly occupied antibonding one.

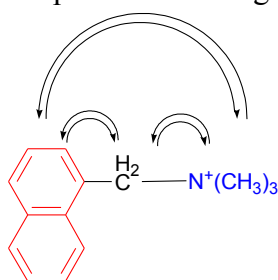

- III. The same as in I+II, but also including the more diffuse Rydberg orbitals with non-negligible occupation.<sup>§</sup>

The models are compared to c1Naph in terms of their canonical HOMO and LUMOs. The results are summarized on Table S6. The contribution of the orbital interactions to the overall effect is again below 0.3 eV, fairly smaller in comparison to the overall shifts in gas phase, as previously discussed on the main text.

<sup>§</sup> Only the Rydberg orbitals of the C1 of the naphthalene and those in the -CH<sub>2</sub>-TAA, having an occupation number >0.0005 e

|               | $\epsilon(\pi)$ /eV | $\epsilon(\pi^*)$ /eV | $\Delta\epsilon(\pi)$ /eV | $\Delta\epsilon(\pi^*)$ /eV |
|---------------|---------------------|-----------------------|---------------------------|-----------------------------|
| <b>MeNaph</b> | -7.69               | 2.83                  | 0                         | 0                           |
| <b>c1Naph</b> | -11.09              | -0.78                 | -3.40                     | -3.61                       |
| model I       | -11.07              | -0.76                 | -3.38                     | -3.59                       |
| model II      | -10.97              | -0.62                 | -3.28                     | -3.44                       |
| model III     | -10.91              | -0.56                 | -3.22                     | -3.39                       |

The same procedure as in model I was applied in the case of the folded conformers of **c7** and **c8Naph** in order to check that the TAA group is not close enough to the chromophore for allowing direct orbital coupling (see main text).

Independently, the same fact can be ensured by the direct inspection of the off-diagonal Fock matrix elements (perturbational analysis).<sup>30</sup> For example, for the selected conformer of **c7Naph**, it has been found that even the closest  $\sigma^*(\text{CH})$  NBOs of the TAA (C42 – H50 and C42 – H51, see Figure S6) the interaction was smaller than 0.01 eV with any  $\pi$  orbital in the chromophore.

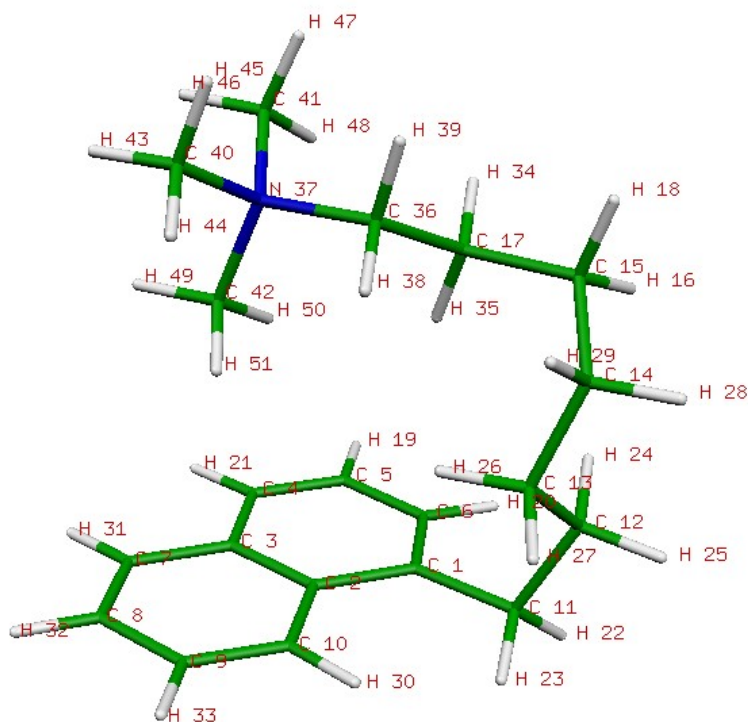

Figure S6: 3D structure of the folded **c7Naph**

## 2.6 Cartesian coordinates of main compounds

### c1-c16Naph series at HF level

c1Naph- Cs conformer

33

|   |           |           |           |
|---|-----------|-----------|-----------|
| C | 1.094275  | -0.064589 | -1.871512 |
| C | 1.097608  | -0.005159 | -0.451276 |
| C | 2.345862  | 0.037965  | 0.204128  |
| C | 3.538763  | 0.021053  | -0.559041 |
| C | 3.499778  | -0.036069 | -1.913674 |
| C | 2.256659  | -0.079426 | -2.575660 |
| C | -0.102278 | 0.013054  | 0.343802  |
| C | 0.000389  | 0.071020  | 1.697725  |
| C | 1.256772  | 0.113863  | 2.345041  |
| C | 2.396139  | 0.097822  | 1.619879  |
| C | -1.392205 | -0.037259 | -0.473005 |
| N | -2.758837 | -0.025359 | 0.221260  |
| C | -2.992632 | 1.262090  | 0.992041  |
| C | -3.806405 | -0.084696 | -0.882565 |
| C | -2.961177 | -1.249361 | 1.097180  |
| H | 3.353003  | 0.130072  | 2.101490  |
| H | -0.857793 | 0.086737  | 2.331946  |
| H | 1.287340  | 0.159028  | 3.414443  |
| H | 4.476791  | 0.054490  | -0.041218 |
| H | 4.405484  | -0.048679 | -2.484684 |
| H | 2.231665  | -0.124480 | -3.645823 |
| H | 0.173184  | -0.098858 | -2.414988 |
| H | -1.395743 | -0.940888 | -1.066445 |
| H | -1.417701 | 0.813258  | -1.139868 |
| H | -3.992298 | 1.236218  | 1.397914  |
| H | -2.270774 | 1.357968  | 1.779212  |
| H | -2.892613 | 2.088257  | 0.305089  |
| H | -4.784001 | -0.077890 | -0.426228 |
| H | -3.688378 | 0.776391  | -1.521493 |
| H | -3.666136 | -0.992906 | -1.447475 |
| H | -3.961614 | -1.214701 | 1.500481  |
| H | -2.839808 | -2.127268 | 0.481549  |
| H | -2.238044 | -1.261083 | 1.888916  |

c1Naph

33

|   |           |           |           |
|---|-----------|-----------|-----------|
| C | -2.098598 | -0.459795 | -1.946201 |
| C | -2.085926 | -0.488351 | -0.528106 |
| C | -0.854185 | -0.523260 | 0.165144  |
| C | 0.357901  | -0.496174 | -0.604862 |
| C | 0.289302  | -0.511960 | -1.970445 |
| C | -0.942115 | -0.485298 | -2.655937 |
| C | -3.305083 | -0.504058 | 0.200256  |
| C | -3.309371 | -0.571873 | 1.555255  |
| C | -2.082559 | -0.636888 | 2.253636  |
| C | -0.899061 | -0.610978 | 1.585038  |
| H | -3.046202 | -0.437682 | -2.453289 |
| C | 1.721603  | -0.535190 | 0.039724  |
| H | 1.194174  | -0.554444 | -2.551524 |
| H | -0.953171 | -0.490951 | -3.729674 |
| H | -4.230205 | -0.469303 | -0.346131 |
| H | -4.235099 | -0.588797 | 2.099577  |
| H | -2.088118 | -0.715775 | 3.325466  |
| H | 0.006576  | -0.685548 | 2.156007  |
| N | 2.391087  | 0.823479  | 0.291365  |
| C | 3.693885  | 0.565495  | 0.975743  |
| C | 2.660738  | 1.535736  | -0.993382 |

|   |          |           |           |
|---|----------|-----------|-----------|
| C | 1.555091 | 1.705635  | 1.160262  |
| H | 2.417123 | -1.067984 | -0.591923 |
| H | 1.707328 | -1.027838 | 0.998347  |
| H | 2.076135 | 2.640821  | 1.300684  |
| H | 0.605135 | 1.879121  | 0.683296  |
| H | 1.405463 | 1.227217  | 2.114441  |
| H | 4.192635 | 1.506065  | 1.154661  |
| H | 3.509586 | 0.067296  | 1.915313  |
| H | 4.309024 | -0.059006 | 0.345668  |
| H | 3.194099 | 2.448731  | -0.775621 |
| H | 3.264896 | 0.905198  | -1.628172 |
| H | 1.726563 | 1.762651  | -1.478189 |

c2Naph- Cs conformer

36

|   |           |           |           |
|---|-----------|-----------|-----------|
| C | 0.644487  | 0.014400  | 0.109607  |
| C | 0.623659  | -0.070379 | 1.543604  |
| C | 1.847841  | -0.071569 | 2.244071  |
| C | 3.071032  | 0.010408  | 1.524586  |
| C | 3.068639  | 0.089511  | 0.174269  |
| C | 1.841201  | 0.091101  | -0.533885 |
| C | 1.843414  | -0.154715 | 3.659767  |
| C | 0.677286  | -0.233240 | 4.352267  |
| C | -0.551259 | -0.232286 | 3.656845  |
| C | -0.577371 | -0.153621 | 2.298752  |
| C | -0.690357 | 0.014015  | -0.624074 |
| C | -0.546655 | 0.107817  | -2.139001 |
| N | -1.850567 | 0.110993  | -2.918964 |
| C | -2.702410 | 1.285240  | -2.557060 |
| C | -1.503617 | 0.207969  | -4.371977 |
| C | -2.622504 | -1.150703 | -2.700563 |
| H | 3.990314  | 0.151664  | -0.374292 |
| H | 1.897228  | 0.155686  | -1.605092 |
| H | 3.996682  | 0.008526  | 2.071246  |
| H | -1.223934 | -0.892439 | -0.361814 |
| H | -1.280696 | 0.846915  | -0.259482 |
| H | -0.040132 | 1.019623  | -2.419410 |
| H | 0.017158  | -0.729908 | -2.522298 |
| H | -1.530141 | -0.155308 | 1.803653  |
| H | 2.785142  | -0.154592 | 4.178636  |
| H | 0.683203  | -0.295793 | 5.424815  |
| H | -1.471957 | -0.294685 | 4.208005  |
| H | -3.474473 | -1.154273 | -3.363615 |
| H | -1.986130 | -1.995420 | -2.917722 |
| H | -2.962383 | -1.198109 | -1.679831 |
| H | -3.555391 | 1.310848  | -3.218324 |
| H | -3.040647 | 1.190358  | -1.539096 |
| H | -2.123433 | 2.189349  | -2.671296 |
| H | -2.413115 | 0.212453  | -4.953147 |
| H | -0.955333 | 1.121501  | -4.544254 |
| H | -0.897643 | -0.641363 | -4.648138 |

c2Naph

36

|   |           |           |           |
|---|-----------|-----------|-----------|
| C | 1.357550  | -0.654926 | -1.234537 |
| C | 1.353503  | -0.541514 | 0.183650  |
| C | 2.597034  | -0.414038 | 0.840101  |
| C | 3.792286  | -0.390072 | 0.074546  |
| C | 3.759649  | -0.492184 | -1.279004 |
| C | 2.519125  | -0.631624 | -1.941101 |
| C | 2.638713  | -0.318511 | 2.256415  |
| C | 1.496931  | -0.350743 | 2.986356  |
| C | 0.249501  | -0.470574 | 2.332089  |
| C | 0.159240  | -0.559193 | 0.975603  |
| C | -1.214948 | -0.639757 | 0.333394  |
| C | -1.624388 | 0.758008  | -0.141615 |

|   |           |           |           |
|---|-----------|-----------|-----------|
| N | -2.958967 | 0.865822  | -0.862712 |
| H | 1.528275  | -0.287449 | 4.058270  |
| H | -0.644736 | -0.498289 | 2.931080  |
| H | 3.593801  | -0.226222 | 2.741311  |
| H | -1.917696 | -1.004545 | 1.071284  |
| H | -1.212498 | -1.350317 | -0.482965 |
| H | -1.692725 | 1.422465  | 0.707809  |
| H | -0.887868 | 1.159122  | -0.822000 |
| H | 0.433610  | -0.782600 | -1.768357 |
| H | 4.731095  | -0.291960 | 0.589385  |
| H | 4.669682  | -0.475602 | -1.849705 |
| H | 2.498998  | -0.727575 | -3.011654 |
| C | -3.192111 | 2.310794  | -1.172855 |
| C | -2.942779 | 0.101105  | -2.145972 |
| C | -4.078594 | 0.374137  | -0.004785 |
| H | -3.873331 | 0.273344  | -2.665744 |
| H | -2.117893 | 0.446376  | -2.750844 |
| H | -2.835987 | -0.951040 | -1.941166 |
| H | -5.014035 | 0.569813  | -0.507172 |
| H | -3.972551 | -0.685568 | 0.157764  |
| H | -4.054741 | 0.897198  | 0.939483  |
| H | -4.128855 | 2.413327  | -1.699547 |
| H | -3.228198 | 2.868906  | -0.249859 |
| H | -2.383813 | 2.674545  | -1.788683 |

c3Naph  
39

|   |           |           |           |
|---|-----------|-----------|-----------|
| C | 1.090598  | 1.121309  | -0.274588 |
| C | 1.098808  | 1.149829  | 1.158854  |
| C | 2.337397  | 1.240752  | 1.830367  |
| C | 3.541088  | 1.312624  | 1.079631  |
| C | 3.509928  | 1.298647  | -0.275019 |
| C | 2.270595  | 1.201390  | -0.950031 |
| C | 2.362732  | 1.266793  | 3.249564  |
| C | 1.214504  | 1.211159  | 3.972242  |
| C | -0.029304 | 1.131904  | 3.306198  |
| C | -0.084295 | 1.101590  | 1.947901  |
| C | -0.199624 | 0.969733  | -1.054919 |
| C | -0.676063 | -0.495782 | -1.097698 |
| C | -1.987591 | -0.593864 | -1.870784 |
| N | -2.579462 | -1.985311 | -2.016340 |
| H | 4.418644  | 1.362839  | -0.844933 |
| H | 2.270197  | 1.195930  | -2.026594 |
| H | 4.476534  | 1.385555  | 1.604785  |
| H | -0.037336 | 1.317424  | -2.069772 |
| H | -0.979248 | 1.599128  | -0.638232 |
| H | 0.098776  | -1.088624 | -1.568700 |
| H | -0.794358 | -0.860005 | -0.085240 |
| H | -2.754177 | -0.000110 | -1.391417 |
| H | -1.860888 | -0.223940 | -2.879315 |
| H | -1.045882 | 1.059311  | 1.470681  |
| H | 3.314136  | 1.336081  | 3.746010  |
| H | 1.244139  | 1.235003  | 5.046110  |
| H | -0.936943 | 1.104162  | 3.881995  |
| C | -3.851091 | -1.863279 | -2.794870 |
| C | -1.651272 | -2.891898 | -2.758619 |
| C | -2.892600 | -2.580982 | -0.681552 |
| H | -4.290345 | -2.842395 | -2.911436 |
| H | -4.532239 | -1.218492 | -2.260815 |
| H | -3.632992 | -1.442834 | -3.764716 |
| H | -3.401092 | -3.521342 | -0.832241 |
| H | -1.979566 | -2.748567 | -0.135407 |
| H | -3.531407 | -1.903690 | -0.134818 |
| H | -2.149176 | -3.834752 | -2.927887 |
| H | -1.397083 | -2.437846 | -3.704630 |
| H | -0.760092 | -3.054756 | -2.176210 |



## c4Naph

42

|   |           |           |           |
|---|-----------|-----------|-----------|
| C | 0.000000  | 0.000000  | 0.000000  |
| C | 0.000000  | 0.000000  | 1.434090  |
| C | 1.235615  | 0.000000  | 2.117284  |
| C | 2.448233  | 0.007085  | 1.377808  |
| C | 2.426814  | 0.018379  | 0.023038  |
| C | 1.189703  | 0.015109  | -0.663120 |
| C | 1.249467  | -0.000604 | 3.536996  |
| C | 0.093489  | 0.003283  | 4.249167  |
| C | -1.146802 | 0.012494  | 3.571753  |
| C | -1.190891 | 0.010168  | 2.212905  |
| C | -1.290493 | -0.048151 | -0.793475 |
| C | -1.870785 | -1.467572 | -0.889302 |
| C | -3.186048 | -1.504919 | -1.681527 |
| C | -3.694717 | -2.941218 | -1.759550 |
| N | -4.995769 | -3.161807 | -2.512795 |
| C | -6.122572 | -2.415430 | -1.875190 |
| C | -4.869787 | -2.744960 | -3.942404 |
| C | -5.306923 | -4.624686 | -2.468125 |
| H | 3.342814  | 0.032186  | -0.539005 |
| H | 1.198350  | 0.028727  | -1.739537 |
| H | 3.381932  | 0.009727  | 1.911303  |
| H | -1.095471 | 0.318132  | -1.796405 |
| H | -2.030072 | 0.621747  | -0.366186 |
| H | -1.137850 | -2.112543 | -1.365648 |
| H | -2.033237 | -1.866008 | 0.107173  |
| H | -3.912054 | -0.864885 | -1.192048 |
| H | -3.012659 | -1.102834 | -2.673754 |
| H | -2.964732 | -3.571322 | -2.248858 |
| H | -3.863111 | -3.334085 | -0.766224 |
| H | -2.147783 | 0.029659  | 1.725745  |
| H | 2.198894  | -0.000727 | 4.042262  |
| H | 0.114900  | 0.005742  | 5.323661  |
| H | -2.059873 | 0.027838  | 4.139562  |
| H | -6.229618 | -4.806719 | -2.997926 |
| H | -4.502690 | -5.171643 | -2.936031 |
| H | -5.409333 | -4.933087 | -1.438903 |
| H | -7.041467 | -2.678634 | -2.377118 |
| H | -6.183284 | -2.691692 | -0.833217 |
| H | -5.953559 | -1.355645 | -1.966606 |
| H | -5.777227 | -3.011490 | -4.463066 |
| H | -4.722787 | -1.679432 | -3.998064 |
| H | -4.029705 | -3.257741 | -4.386276 |

## c7Naph- Folded conformer

51

|   |           |           |           |
|---|-----------|-----------|-----------|
| C | -1.951785 | -0.114841 | -1.682008 |
| C | -2.221310 | -0.207597 | -0.287867 |
| C | -2.281087 | -1.495016 | 0.288741  |
| C | -2.063195 | -2.636897 | -0.526371 |
| C | -1.802478 | -2.511614 | -1.852952 |
| C | -1.750200 | -1.226407 | -2.438448 |
| C | -2.564334 | -1.632986 | 1.673679  |
| C | -2.781654 | -0.538886 | 2.442901  |
| C | -2.718933 | 0.751942  | 1.867491  |
| C | -2.442682 | 0.937473  | 0.546653  |
| C | -2.345454 | 2.348011  | 0.000557  |
| C | -0.893142 | 2.835246  | -0.118062 |
| C | -0.057999 | 1.949102  | -1.054126 |
| C | 1.361981  | 2.499502  | -1.146358 |
| C | 2.114877  | 2.577372  | 0.102115  |
| C | 2.290668  | 1.224546  | 0.712339  |
| C | 2.937067  | 0.278716  | -0.331726 |
| N | 3.122745  | -1.119066 | 0.287411  |
| C | 1.832004  | -1.647232 | 0.684310  |

|   |           |           |           |
|---|-----------|-----------|-----------|
| C | 3.727441  | -2.003874 | -0.689295 |
| C | 3.983616  | -1.022183 | 1.450174  |
| H | 1.628514  | 3.230673  | 0.811375  |
| H | 3.090087  | 2.981653  | -0.125747 |
| H | -3.004425 | -0.640723 | 3.489391  |
| H | -2.899581 | 1.605633  | 2.497976  |
| H | -2.609430 | -2.619710 | 2.098839  |
| H | -2.884913 | 3.015643  | 0.664874  |
| H | -2.836370 | 2.421512  | -0.964800 |
| H | -0.433311 | 2.803811  | 0.865632  |
| H | -0.876000 | 3.846438  | -0.512143 |
| H | -0.054072 | 0.934620  | -0.670553 |
| H | -0.527157 | 1.926820  | -2.031696 |
| H | 1.347920  | 3.510569  | -1.529606 |
| H | 1.961067  | 1.883868  | -1.803234 |
| H | -1.918101 | 0.847840  | -2.156832 |
| H | -2.112045 | -3.610402 | -0.071832 |
| H | -1.641885 | -3.382524 | -2.461826 |
| H | -1.555467 | -1.132211 | -3.491798 |
| H | 2.935487  | 1.313283  | 1.573680  |
| H | 1.333288  | 0.837198  | 1.018024  |
| H | 2.289929  | 0.205887  | -1.205802 |
| H | 3.906459  | 0.675387  | -0.629810 |
| H | 3.858743  | -2.992306 | -0.251476 |
| H | 3.080897  | -2.076637 | -1.562568 |
| H | 4.696833  | -1.607204 | -0.987379 |
| H | 4.114916  | -2.010613 | 1.887992  |
| H | 4.953008  | -0.625511 | 1.152090  |
| H | 3.529468  | -0.357660 | 2.183713  |
| H | 1.963305  | -2.635663 | 1.122129  |
| H | 1.377856  | -0.982710 | 1.417850  |
| H | 1.185461  | -1.719995 | -0.188964 |

c7Naph

51

|   |           |           |           |
|---|-----------|-----------|-----------|
| C | 3.727985  | 1.466808  | -0.662010 |
| C | 4.206241  | 0.206511  | -0.205795 |
| C | 5.438568  | 0.178069  | 0.483030  |
| C | 6.145848  | 1.389952  | 0.700668  |
| C | 5.658122  | 2.575818  | 0.254394  |
| C | 4.428170  | 2.610946  | -0.441116 |
| C | 5.957701  | -1.060728 | 0.944413  |
| C | 5.279268  | -2.212346 | 0.722362  |
| C | 4.044443  | -2.184925 | 0.032301  |
| C | 3.499230  | -1.022661 | -0.423707 |
| C | 2.153471  | -1.054931 | -1.121085 |
| C | 0.984632  | -0.679747 | -0.197601 |
| C | -0.367152 | -0.704643 | -0.913727 |
| C | -1.533400 | -0.353294 | 0.012443  |
| C | -2.887437 | -0.376342 | -0.700911 |
| C | -4.047759 | -0.023199 | 0.241368  |
| C | -5.367407 | -0.062604 | -0.523229 |
| H | 5.672331  | -3.152930 | 1.064031  |
| H | 3.527551  | -3.114066 | -0.135668 |
| H | 6.898126  | -1.068771 | 1.466383  |
| H | 1.987548  | -2.057546 | -1.502893 |
| H | 2.157764  | -0.402586 | -1.988989 |
| H | 0.966220  | -1.372455 | 0.640077  |
| H | 1.152673  | 0.306032  | 0.226753  |
| H | -0.348459 | -0.007068 | -1.749079 |
| H | -0.532703 | -1.691234 | -1.342413 |
| H | -1.554522 | -1.051720 | 0.846263  |
| H | -1.369468 | 0.633192  | 0.440856  |
| H | 2.799768  | 1.520790  | -1.198352 |
| H | 7.083386  | 1.351129  | 1.226748  |
| H | 6.202997  | 3.487193  | 0.422284  |
| H | 4.049112  | 3.551136  | -0.800267 |

|   |           |           |           |
|---|-----------|-----------|-----------|
| H | -2.870705 | 0.324159  | -1.532482 |
| H | -3.055179 | -1.362409 | -1.127533 |
| H | -4.058484 | -0.728991 | 1.064484  |
| H | -3.873618 | 0.962501  | 0.658323  |
| N | -6.620919 | 0.264816  | 0.270652  |
| H | -5.348714 | 0.643800  | -1.341840 |
| H | -5.533489 | -1.048397 | -0.935670 |
| C | -7.789009 | 0.169184  | -0.659394 |
| C | -6.821457 | -0.706479 | 1.388732  |
| C | -6.563816 | 1.652550  | 0.822607  |
| H | -7.510322 | 1.879506  | 1.289688  |
| H | -5.776257 | 1.720070  | 1.554182  |
| H | -6.379102 | 2.345562  | 0.015559  |
| H | -8.693474 | 0.398228  | -0.116579 |
| H | -7.657895 | 0.874883  | -1.465442 |
| H | -7.844442 | -0.833282 | -1.055504 |
| H | -7.770334 | -0.501045 | 1.860935  |
| H | -6.821898 | -1.709303 | 0.988662  |
| H | -6.029431 | -0.597720 | 2.110447  |

c8Naph- Folded conformer

54

|   |           |           |           |
|---|-----------|-----------|-----------|
| C | -2.022876 | 1.335562  | 0.632603  |
| C | -2.226102 | 0.194824  | -0.216850 |
| C | -2.452647 | -1.073267 | 0.371219  |
| C | -2.460393 | -1.204632 | 1.784540  |
| C | -2.244331 | -0.120357 | 2.571496  |
| C | -2.030114 | 1.147876  | 1.985892  |
| C | -2.677401 | -2.203600 | -0.462502 |
| C | -2.670782 | -2.089916 | -1.816014 |
| C | -2.439361 | -0.827723 | -2.412301 |
| C | -2.229609 | 0.272260  | -1.640594 |
| C | -1.836078 | 2.752692  | 0.106362  |
| C | -0.376736 | 3.242462  | 0.064282  |
| C | 0.475629  | 2.581908  | -1.020887 |
| C | 1.949075  | 3.009193  | -1.035669 |
| C | 2.770973  | 2.652592  | 0.213914  |
| C | 2.684455  | 1.190709  | 0.675494  |
| C | 3.125399  | 0.191316  | -0.402344 |
| C | 3.318478  | -1.266559 | 0.028034  |
| N | 2.094774  | -2.162740 | 0.146794  |
| H | 3.947799  | -1.765153 | -0.695692 |
| H | 3.812558  | -1.317590 | 0.988866  |
| H | -2.263599 | -0.209850 | 3.642821  |
| H | -1.899678 | 1.996584  | 2.634565  |
| H | -2.660736 | -2.168639 | 2.219100  |
| H | -2.390713 | 3.414804  | 0.762047  |
| H | -2.287357 | 2.868474  | -0.871254 |
| H | -0.383198 | 4.316431  | -0.103132 |
| H | 0.067568  | 3.089908  | 1.043720  |
| H | 0.406578  | 1.501140  | -0.928097 |
| H | 0.048608  | 2.821254  | -1.991657 |
| H | 2.006620  | 4.084747  | -1.177246 |
| H | 2.421714  | 2.575339  | -1.913572 |
| H | -2.073479 | 1.217651  | -2.120799 |
| H | -2.878042 | -3.153573 | 0.002301  |
| H | -2.861367 | -2.946902 | -2.436812 |
| H | -2.449600 | -0.736959 | -3.483506 |
| H | 2.464081  | 3.278085  | 1.045672  |
| H | 3.811013  | 2.903748  | 0.021817  |
| H | 1.674051  | 0.990817  | 1.008050  |
| H | 3.322791  | 1.069195  | 1.547658  |
| H | 2.487790  | 0.246701  | -1.275313 |
| H | 4.110078  | 0.491887  | -0.749805 |
| C | 2.587115  | -3.539750 | 0.460365  |
| C | 1.176876  | -1.734052 | 1.247713  |
| C | 1.328556  | -2.214291 | -1.136477 |

|   |          |           |           |
|---|----------|-----------|-----------|
| H | 1.741660 | -4.204360 | 0.550434  |
| H | 3.232863 | -3.877923 | -0.335496 |
| H | 3.133663 | -3.516727 | 1.391050  |
| H | 0.431107 | -2.499656 | 1.390159  |
| H | 1.750099 | -1.603252 | 2.152917  |
| H | 0.685803 | -0.817677 | 0.977770  |
| H | 0.539274 | -2.943379 | -1.039737 |
| H | 0.888827 | -1.252956 | -1.339422 |
| H | 1.999051 | -2.496477 | -1.934636 |

c8Naph  
54

|   |           |           |           |
|---|-----------|-----------|-----------|
| C | 4.095354  | -1.000194 | -0.420268 |
| C | 4.800261  | 0.230247  | -0.202146 |
| C | 6.050007  | 0.200357  | 0.454527  |
| C | 6.588433  | -1.041291 | 0.885025  |
| C | 5.911352  | -2.193893 | 0.663946  |
| C | 4.659404  | -2.164994 | 0.005523  |
| C | 6.754844  | 1.413824  | 0.671388  |
| C | 6.248057  | 2.602573  | 0.255054  |
| C | 5.000187  | 2.639353  | -0.407717 |
| C | 4.302059  | 1.493711  | -0.627225 |
| C | 2.733247  | -1.031583 | -1.085274 |
| C | 1.582931  | -0.678632 | -0.130234 |
| C | 0.215406  | -0.703409 | -0.815578 |
| C | -0.934070 | -0.374561 | 0.139200  |
| C | -2.303917 | -0.397368 | -0.542132 |
| C | -3.447940 | -0.068682 | 0.420142  |
| C | -4.819319 | -0.094071 | -0.270980 |
| C | -5.913330 | 0.240196  | 0.738507  |
| H | -5.747298 | 1.221593  | 1.161290  |
| N | -7.339282 | 0.257545  | 0.213367  |
| H | -5.910173 | -0.477553 | 1.547380  |
| H | 6.318493  | -3.136625 | 0.982631  |
| H | 4.144010  | -3.094973 | -0.162283 |
| H | 7.541785  | -1.050526 | 1.383065  |
| H | 2.565476  | -2.029658 | -1.478132 |
| H | 2.712947  | -0.366771 | -1.943507 |
| H | 1.588718  | -1.383286 | 0.697660  |
| H | 1.753342  | 0.302091  | 0.304915  |
| H | 0.211000  | 0.005789  | -1.641570 |
| H | 0.048260  | -1.685061 | -1.255355 |
| H | -0.931180 | -1.084309 | 0.963941  |
| H | -0.767737 | 0.606713  | 0.579034  |
| H | 3.359254  | 1.548840  | -1.137184 |
| H | 7.705783  | 1.373897  | 1.172852  |
| H | 6.791089  | 3.515213  | 0.422389  |
| H | 4.605274  | 3.582070  | -0.742356 |
| H | -2.310688 | 0.314073  | -1.365293 |
| H | -2.473577 | -1.378470 | -0.980789 |
| H | -3.444455 | -0.780404 | 1.242256  |
| H | -3.281777 | 0.912975  | 0.857378  |
| H | -4.815330 | 0.621445  | -1.085701 |
| H | -4.978293 | -1.077211 | -0.699822 |
| C | -8.242490 | 0.603548  | 1.354795  |
| C | -7.508384 | 1.286844  | -0.856829 |
| C | -7.735446 | -1.081687 | -0.318518 |
| H | -8.552045 | 1.336886  | -1.128707 |
| H | -7.182776 | 2.244534  | -0.479267 |
| H | -6.924628 | 1.012692  | -1.719436 |
| H | -9.263640 | 0.622013  | 1.005322  |
| H | -8.134590 | -0.140571 | 2.129126  |
| H | -7.970165 | 1.574593  | 1.739315  |
| H | -8.781242 | -1.053860 | -0.585326 |
| H | -7.147707 | -1.314097 | -1.190623 |
| H | -7.573039 | -1.826592 | 0.445997  |

## c10Naph

60

|   |            |           |           |
|---|------------|-----------|-----------|
| C | 5.303323   | -0.977639 | -0.372091 |
| C | 5.976473   | 0.274172  | -0.175524 |
| C | 7.214402   | 0.291700  | 0.503664  |
| C | 7.772690   | -0.924564 | 0.978896  |
| C | 7.125432   | -2.097939 | 0.778689  |
| C | 5.885757   | -2.116539 | 0.097082  |
| C | 7.887294   | 1.526891  | 0.698425  |
| C | 7.360947   | 2.691425  | 0.240067  |
| C | 6.124469   | 2.680792  | -0.444681 |
| C | 5.456946   | 1.513458  | -0.644095 |
| C | 3.955660   | -1.059110 | -1.061916 |
| C | 2.776878   | -0.707991 | -0.141369 |
| C | 1.425376   | -0.784376 | -0.854012 |
| C | 0.246120   | -0.457572 | 0.064232  |
| C | -1.107951  | -0.531489 | -0.644049 |
| H | 7.547375   | -3.021805 | 1.131810  |
| H | 5.394414   | -3.062363 | -0.053170 |
| H | 8.716593   | -0.897915 | 1.494155  |
| H | 3.819429   | -2.071171 | -1.430485 |
| H | 3.937958   | -0.418833 | -1.938695 |
| H | 2.781620   | -1.389242 | 0.706001  |
| H | 2.914812   | 0.288044  | 0.270157  |
| H | 1.423138   | -0.098892 | -1.700008 |
| H | 1.291741   | -1.781492 | -1.270191 |
| H | 0.247605   | -1.143718 | 0.909058  |
| H | 0.379871   | 0.539015  | 0.480809  |
| H | 4.521649   | 1.532149  | -1.170023 |
| H | 8.829638   | 1.523142  | 1.217529  |
| H | 7.879782   | 3.620883  | 0.391363  |
| H | 5.713396   | 3.604459  | -0.811474 |
| C | -2.284318  | -0.205108 | 0.278267  |
| H | -1.111561  | 0.155607  | -1.488211 |
| H | -1.243277  | -1.527998 | -1.060403 |
| C | -3.638554  | -0.279437 | -0.430154 |
| H | -2.282299  | -0.892137 | 1.122165  |
| H | -2.150785  | 0.791551  | 0.694224  |
| C | -4.810928  | 0.047741  | 0.497949  |
| H | -3.644177  | 0.408815  | -1.272796 |
| H | -3.775550  | -1.275968 | -0.844786 |
| C | -6.165463  | -0.029730 | -0.221850 |
| H | -4.808882  | -0.640913 | 1.339490  |
| H | -4.677627  | 1.044719  | 0.911118  |
| C | -7.289655  | 0.305609  | 0.753653  |
| H | -6.160015  | 0.663020  | -1.056036 |
| H | -6.291586  | -1.027840 | -0.626408 |
| N | -8.703228  | 0.274074  | 0.197127  |
| H | -7.287686  | -0.389327 | 1.582219  |
| H | -7.156184  | 1.301932  | 1.152384  |
| C | -9.639993  | 0.629397  | 1.308355  |
| C | -8.872334  | 1.269235  | -0.905000 |
| C | -9.055696  | -1.088498 | -0.305666 |
| H | -9.910399  | 1.286197  | -1.201129 |
| H | -8.578364  | 2.244597  | -0.547302 |
| H | -8.262699  | 0.985898  | -1.746468 |
| H | -10.653109 | 0.613571  | 0.936168  |
| H | -9.532202  | -0.090290 | 2.105430  |
| H | -9.399442  | 1.616912  | 1.671457  |
| H | -10.095436 | -1.093031 | -0.596322 |
| H | -8.442870  | -1.330693 | -1.157597 |
| H | -8.893528  | -1.807965 | 0.482855  |

## c16Naph

78

|   |          |           |           |
|---|----------|-----------|-----------|
| C | 8.822406 | -0.897557 | -0.072351 |
|---|----------|-----------|-----------|

|   |            |           |           |
|---|------------|-----------|-----------|
| C | 9.368494   | 0.428488  | -0.075089 |
| C | 10.490234  | 0.707070  | 0.735830  |
| C | 11.058501  | -0.325043 | 1.529008  |
| C | 10.534541  | -1.574464 | 1.509004  |
| C | 9.408644   | -1.854536 | 0.699572  |
| C | 11.040139  | 2.016014  | 0.742680  |
| C | 10.507631  | 3.003930  | -0.021483 |
| C | 9.390425   | 2.729711  | -0.842427 |
| C | 8.840834   | 1.486425  | -0.867062 |
| C | 7.591166   | -1.250311 | -0.882847 |
| C | 6.288065   | -0.815886 | -0.194456 |
| C | 5.046590   | -1.163124 | -1.029379 |
| C | 3.789962   | -0.728459 | -0.281221 |
| C | 2.452753   | -0.999470 | -0.973555 |
| H | 10.967626  | -2.359429 | 2.101799  |
| H | 9.013054   | -2.855754 | 0.697048  |
| H | 11.914318  | -0.099257 | 2.139760  |
| H | 7.567681   | -2.325589 | -1.028764 |
| H | 7.644981   | -0.812416 | -1.874648 |
| H | 6.226074   | -1.303516 | 0.774286  |
| H | 6.312278   | 0.252205  | -0.002887 |
| H | 5.115415   | -0.664088 | -1.989870 |
| H | 5.033838   | -2.231331 | -1.216516 |
| H | 3.730007   | -1.230972 | 0.674403  |
| H | 3.812214   | 0.337018  | -0.097749 |
| H | 7.999930   | 1.304543  | -1.509827 |
| H | 11.894493  | 2.211897  | 1.365908  |
| H | 10.933211  | 3.990732  | -0.011312 |
| H | 8.979281   | 3.511836  | -1.455275 |
| C | 1.309345   | -0.502411 | -0.086735 |
| H | 2.425604   | -0.476124 | -1.928171 |
| H | 2.341973   | -2.069500 | -1.142918 |
| C | -0.027864  | -0.773423 | -0.779068 |
| H | 1.336504   | -1.025758 | 0.867881  |
| H | 1.420136   | 0.567618  | 0.082629  |
| C | -1.171272  | -0.276363 | 0.107752  |
| H | -0.055013  | -0.250076 | -1.733684 |
| H | -0.138644  | -1.843453 | -0.948432 |
| C | -2.508480  | -0.547375 | -0.584581 |
| H | -1.144113  | -0.799711 | 1.062368  |
| H | -1.060481  | 0.793666  | 0.277115  |
| C | -3.651889  | -0.050316 | 0.302239  |
| H | -2.535630  | -0.024028 | -1.539198 |
| H | -2.619261  | -1.617405 | -0.753945 |
| C | -4.989097  | -0.321327 | -0.390095 |
| H | -3.624730  | -0.573663 | 1.256854  |
| H | -3.541098  | 1.019714  | 0.471602  |
| C | -6.132506  | 0.175732  | 0.496725  |
| H | -5.016247  | 0.202019  | -1.344711 |
| H | -5.099878  | -1.391357 | -0.559459 |
| C | -7.469714  | -0.095280 | -0.195608 |
| H | -6.105347  | -0.347615 | 1.451341  |
| H | -6.021715  | 1.245761  | 0.666088  |
| C | -8.613123  | 0.401780  | 0.691212  |
| H | -7.496864  | 0.428067  | -1.150225 |
| H | -7.580495  | -1.165310 | -0.364972 |
| C | -9.950331  | 0.130768  | -0.001122 |
| H | -8.585964  | -0.121568 | 1.645827  |
| H | -8.502332  | 1.471809  | 0.860575  |
| C | -11.093740 | 0.627827  | 0.885698  |
| H | -9.977481  | 0.654115  | -0.955738 |
| H | -10.061112 | -0.939262 | -0.170486 |
| N | -12.434444 | 0.356107  | 0.191555  |
| H | -11.066581 | 0.104480  | 1.840314  |
| H | -10.982949 | 1.697857  | 1.055062  |
| C | -13.547959 | 0.840172  | 1.055190  |
| C | -12.471591 | 1.072164  | -1.114578 |
| C | -12.586018 | -1.107938 | -0.040173 |

|   |            |           |           |
|---|------------|-----------|-----------|
| H | -13.423368 | 0.879268  | -1.607356 |
| H | -12.360804 | 2.142193  | -0.945206 |
| H | -11.657748 | 0.718373  | -1.745777 |
| H | -14.499737 | 0.647275  | 0.562412  |
| H | -13.520801 | 0.316824  | 2.009806  |
| H | -13.437169 | 1.910201  | 1.224553  |
| H | -13.537796 | -1.300834 | -0.532952 |
| H | -11.772174 | -1.461720 | -0.671377 |
| H | -12.558863 | -1.631277 | 0.914446  |

#### MeNaph

21

|   |           |           |           |
|---|-----------|-----------|-----------|
| C | -0.316330 | 0.046571  | -1.711479 |
| C | -0.282539 | 0.004925  | -0.292836 |
| C | 0.974426  | 0.002595  | 0.347022  |
| C | 2.152917  | 0.041761  | -0.439865 |
| C | 2.085944  | 0.081111  | -1.794577 |
| C | 0.830168  | 0.083455  | -2.438973 |
| C | -1.471675 | -0.034641 | 0.501666  |
| C | -1.362116 | -0.073280 | 1.856088  |
| C | -0.101637 | -0.075261 | 2.496130  |
| C | 1.036361  | -0.038385 | 1.763946  |
| C | -2.836680 | -0.033151 | -0.160896 |
| H | 1.997898  | -0.039721 | 2.239404  |
| H | -2.248370 | -0.102973 | 2.459353  |
| H | -0.058814 | -0.106475 | 3.566809  |
| H | 3.102540  | 0.039528  | 0.059437  |
| H | 2.982127  | 0.110448  | -2.381805 |
| H | 0.787305  | 0.114712  | -3.509648 |
| H | -1.261994 | 0.048932  | -2.212621 |
| H | -3.617669 | -0.065789 | 0.587790  |
| H | -2.979746 | 0.862075  | -0.756951 |
| H | -2.956311 | -0.894936 | -0.809117 |

---

#### Anthracene and pyrene derivatives at the B3LYP level

#### MeAnt

27

|   |           |           |           |
|---|-----------|-----------|-----------|
| C | -0.267592 | 0.011324  | -2.954079 |
| C | -0.244033 | 0.019477  | -1.524247 |
| C | 1.027031  | 0.010048  | -0.833081 |
| C | 2.209816  | -0.031823 | -1.643030 |
| C | 2.145366  | -0.047331 | -3.012327 |
| C | 0.890161  | -0.020129 | -3.682640 |
| C | -1.429108 | 0.033742  | -0.785197 |
| C | -1.417425 | 0.019555  | 0.611388  |
| C | -0.152441 | 0.010140  | 1.313643  |
| C | 1.061033  | 0.031786  | 0.582983  |
| C | -2.636947 | 0.011389  | 1.358216  |
| C | -2.631098 | -0.020041 | 2.726116  |
| C | -1.392229 | -0.047173 | 3.426167  |
| C | -0.201880 | -0.031706 | 2.746321  |
| C | 2.388031  | 0.059724  | 1.311969  |
| H | 2.764479  | -0.951836 | 1.517779  |
| H | 0.857891  | -0.028556 | -4.768707 |
| H | 3.062100  | -0.083547 | -3.594938 |
| H | -1.235094 | 0.025383  | -3.450612 |
| H | 3.182705  | -0.068452 | -1.166432 |
| H | -2.382720 | 0.045967  | -1.309143 |
| H | -3.574853 | 0.025308  | 0.807817  |
| H | 0.722079  | -0.068243 | 3.311975  |
| H | -3.565124 | -0.028415 | 3.281255  |

|   |           |           |          |
|---|-----------|-----------|----------|
| H | -1.392418 | -0.083412 | 4.512369 |
| H | 2.313395  | 0.580229  | 2.269227 |
| H | 3.155445  | 0.581679  | 0.736201 |

clAnt  
48

|   |           |           |           |
|---|-----------|-----------|-----------|
| C | 0.949920  | 1.048668  | -2.221612 |
| C | 1.133709  | 0.836158  | -0.815550 |
| C | 2.501387  | 0.770334  | -0.349738 |
| C | 3.581792  | 0.874720  | -1.279979 |
| C | 3.351186  | 1.061214  | -2.615367 |
| C | 2.013429  | 1.162663  | -3.082658 |
| C | 0.072271  | 0.697736  | 0.126123  |
| C | 0.352534  | 0.639683  | 1.521103  |
| C | 1.729210  | 0.571972  | 1.961127  |
| C | 2.755227  | 0.611574  | 1.014952  |
| C | -0.644757 | 0.673896  | 2.549805  |
| C | -0.314619 | 0.611473  | 3.880561  |
| C | 1.039271  | 0.494277  | 4.296916  |
| C | 2.031476  | 0.481330  | 3.355604  |
| C | -1.349007 | 0.689014  | -0.366292 |
| N | -2.027581 | -0.694542 | -0.693101 |
| C | -1.157765 | -1.603556 | -1.572424 |
| C | -0.061790 | -2.411265 | -0.881882 |
| C | -2.395030 | -1.387003 | 0.618965  |
| C | -3.143043 | -2.713987 | 0.507449  |
| C | -3.329225 | -0.379710 | -1.441684 |
| C | -3.198681 | 0.203971  | -2.845584 |
| H | 1.277160  | 0.435589  | 5.354259  |
| H | -1.100077 | 0.663137  | 4.629156  |
| H | 3.075472  | 0.418304  | 3.650373  |
| H | -1.690905 | 0.790413  | 2.292460  |
| H | 3.786548  | 0.547041  | 1.354071  |
| H | 4.596222  | 0.814067  | -0.895212 |
| H | -0.045731 | 1.162741  | -2.636217 |
| H | 4.176953  | 1.147530  | -3.314363 |
| H | 1.829349  | 1.344024  | -4.137736 |
| H | -1.435727 | 1.251397  | -1.290363 |
| H | -2.034159 | 1.145512  | 0.348543  |
| H | -1.459970 | -1.507257 | 1.164464  |
| H | -3.006707 | -0.667255 | 1.167684  |
| H | -1.856916 | -2.280787 | -2.069295 |
| H | -0.722220 | -0.957355 | -2.332787 |
| H | -3.878219 | -1.319943 | -1.493069 |
| H | -3.886698 | 0.299873  | -0.790633 |
| H | 0.468302  | -2.956447 | -1.670195 |
| H | 0.667339  | -1.788232 | -0.365697 |
| H | -0.452987 | -3.154775 | -0.183967 |
| H | -3.203509 | -3.134618 | 1.516528  |
| H | -4.169193 | -2.599500 | 0.149700  |
| H | -2.633882 | -3.450599 | -0.118460 |
| H | -4.214704 | 0.337124  | -3.231457 |
| H | -2.719455 | 1.185805  | -2.872223 |
| H | -2.678115 | -0.465094 | -3.535166 |

MePy  
29

|   |           |           |           |
|---|-----------|-----------|-----------|
| C | -1.064490 | -0.000172 | -3.084561 |
| C | -1.069864 | -0.000018 | -1.679629 |
| C | 0.173183  | -0.000134 | -0.977153 |
| C | 1.399513  | -0.000404 | -1.711825 |
| C | 1.354794  | -0.000549 | -3.114930 |
| C | 0.135674  | -0.000435 | -3.791450 |
| C | 2.639986  | -0.000515 | -0.985674 |



|   |           |           |           |
|---|-----------|-----------|-----------|
| C | 2.659152  | -0.000370 | 0.374917  |
| C | 1.442471  | -0.000099 | 1.139823  |
| C | 0.190550  | 0.000020  | 0.451296  |
| C | -1.035417 | 0.000289  | 1.188098  |
| C | -1.002238 | 0.000437  | 2.603989  |
| C | 0.238655  | 0.000318  | 3.248359  |
| C | 1.437733  | 0.000056  | 2.540892  |
| C | -2.284514 | 0.000252  | -0.915928 |
| C | -2.268221 | 0.000399  | 0.446360  |
| C | -2.272448 | 0.000726  | 3.422320  |
| H | 0.264493  | 0.000434  | 4.335602  |
| H | 2.383888  | -0.000030 | 3.076938  |
| H | 3.604180  | -0.000456 | 0.913093  |
| H | 3.568771  | -0.000720 | -1.551164 |
| H | 2.287848  | -0.000754 | -3.673334 |
| H | 0.122133  | -0.000551 | -4.878112 |
| H | -2.012351 | -0.000083 | -3.617476 |
| H | -3.230760 | 0.000339  | -1.452070 |
| H | -3.207240 | 0.000602  | 0.990236  |
| H | -2.043230 | 0.000810  | 4.492145  |
| H | -2.892290 | 0.882909  | 3.217259  |
| H | -2.892562 | -0.881312 | 3.217457  |

c1Py  
41

|   |           |           |           |
|---|-----------|-----------|-----------|
| C | -3.689496 | -0.409250 | -3.038443 |
| C | -3.678900 | -0.448824 | -1.646212 |
| C | -2.465060 | -0.443036 | -0.939728 |
| C | -1.233474 | -0.397074 | -1.657117 |
| C | -1.255245 | -0.362949 | -3.084858 |
| C | -2.491866 | -0.367105 | -3.750388 |
| C | -0.009950 | -0.330325 | -3.796558 |
| C | 1.180455  | -0.335912 | -3.135461 |
| C | 1.231827  | -0.367182 | -1.702267 |
| C | 0.011117  | -0.390144 | -0.956541 |
| C | 0.035620  | -0.413148 | 0.478183  |
| C | 1.296663  | -0.390796 | 1.137736  |
| C | 2.477744  | -0.412613 | 0.374436  |
| C | 2.454593  | -0.393611 | -1.010616 |
| C | -2.413373 | -0.496223 | 0.489598  |
| C | -1.228222 | -0.479099 | 1.163362  |
| C | 1.421879  | -0.411303 | 2.629633  |
| N | 1.564704  | 0.991777  | 3.325977  |
| C | 0.398922  | 1.883658  | 2.997120  |
| C | 1.615373  | 0.766238  | 4.812137  |
| C | 2.833849  | 1.668650  | 2.886889  |
| H | 3.438076  | -0.463376 | 0.882681  |
| H | 3.384790  | -0.411927 | -1.570972 |
| H | 2.117354  | -0.318927 | -3.685126 |
| H | -0.034583 | -0.306425 | -4.882690 |
| H | -2.506661 | -0.339884 | -4.836610 |
| H | -4.634895 | -0.414087 | -3.572208 |
| H | -4.614273 | -0.486972 | -1.094241 |
| H | -3.348609 | -0.559355 | 1.039985  |
| H | -1.254328 | -0.543156 | 2.246381  |
| H | 0.566849  | -0.871165 | 3.126609  |
| H | 2.323244  | -0.943981 | 2.943357  |
| H | 1.734541  | 1.726802  | 5.316403  |
| H | 0.685906  | 0.292999  | 5.132069  |
| H | 2.461370  | 0.117641  | 5.045099  |
| H | 0.543889  | 2.843102  | 3.496790  |
| H | 0.353501  | 2.019799  | 1.917518  |
| H | -0.519677 | 1.415083  | 3.349639  |
| H | 2.913797  | 2.628672  | 3.399677  |
| H | 3.683195  | 1.036000  | 3.149900  |
| H | 2.798855  | 1.816989  | 1.808470  |

**Main pyrene derivatives at HF level and MePy plus external (non bonded) electric filed as array of charges.**

MePy

|   |           |           |           |
|---|-----------|-----------|-----------|
| C | -0.277522 | -0.487588 | -1.601967 |
| C | -0.277522 | -0.487588 | -0.154226 |
| C | 0.970920  | -0.487588 | 0.507404  |
| C | 2.190422  | -0.487328 | -0.248130 |
| C | 2.149961  | -0.487242 | -1.657847 |
| C | 0.861676  | -0.487398 | -2.307225 |
| C | 3.437528  | -0.487308 | 0.416197  |
| C | 4.607481  | -0.487034 | -0.335043 |
| C | 4.558835  | -0.486844 | -1.719070 |
| C | 3.342728  | -0.486925 | -2.376453 |
| C | 1.028613  | -0.487780 | 1.918666  |
| C | 2.319939  | -0.487732 | 2.569040  |
| C | 3.456025  | -0.487510 | 1.862191  |
| C | -1.463546 | -0.487907 | 0.595635  |
| C | -1.377465 | -0.487941 | 1.979668  |
| C | -0.158815 | -0.487957 | 2.635048  |
| C | -2.822077 | -0.487830 | -0.069020 |
| H | -2.962390 | 0.387784  | -0.695740 |
| H | -2.282805 | -0.488283 | 2.560774  |
| H | -0.131140 | -0.488145 | 3.710692  |
| H | 2.345944  | -0.487912 | 3.644616  |
| H | 4.410002  | -0.487476 | 2.359375  |
| H | 5.558213  | -0.487018 | 0.168599  |
| H | 5.472967  | -0.486632 | -2.285415 |
| H | 3.311786  | -0.486858 | -3.451893 |
| H | 0.833418  | -0.487461 | -3.382766 |
| H | -1.217281 | -0.487801 | -2.120421 |
| H | -2.962883 | -1.363914 | -0.694979 |
| H | -3.609043 | -0.487281 | 0.675202  |

c1Py

|   |           |           |           |
|---|-----------|-----------|-----------|
| C | 0.253048  | -1.624447 | -0.612607 |
| C | 0.342267  | -0.184045 | -0.480612 |
| C | -0.858682 | 0.523203  | -0.212418 |
| C | -2.094318 | -0.184428 | -0.040847 |
| C | -2.132396 | -1.588191 | -0.152952 |
| C | -0.907421 | -2.278183 | -0.460506 |
| C | -3.283608 | 0.521921  | 0.238622  |
| C | -4.470871 | -0.184199 | 0.406458  |
| C | -4.497808 | -1.563733 | 0.298113  |
| C | -3.337377 | -2.262274 | 0.017924  |
| C | -0.854607 | 1.932771  | -0.116866 |
| C | -2.086626 | 2.629146  | 0.164807  |
| C | -3.234000 | 1.960479  | 0.336576  |
| C | 1.538299  | 0.542671  | -0.620644 |
| C | 1.502480  | 1.935502  | -0.565707 |
| C | 0.338780  | 2.623375  | -0.312026 |
| C | 2.862303  | -0.113081 | -0.913771 |
| N | 3.751262  | -0.418515 | 0.304262  |
| C | 4.133591  | 0.835164  | 1.019316  |
| C | 3.070487  | -1.331214 | 1.270291  |
| C | 4.992692  | -1.081001 | -0.195153 |
| H | 2.405007  | 2.495925  | -0.737731 |
| H | 0.346576  | 3.697209  | -0.273770 |
| H | -2.060395 | 3.701393  | 0.233111  |
| H | -4.145781 | 2.489659  | 0.547263  |
| H | -5.377312 | 0.353069  | 0.620345  |

|   |           |           |           |
|---|-----------|-----------|-----------|
| H | -5.423661 | -2.092710 | 0.428625  |
| H | -3.363202 | -3.333573 | -0.071711 |
| H | -0.939613 | -3.346647 | -0.578814 |
| H | 1.126022  | -2.193427 | -0.866996 |
| H | 2.754827  | -1.054982 | -1.426197 |
| H | 3.468892  | 0.530149  | -1.534870 |
| H | 5.638575  | -1.301951 | 0.641303  |
| H | 4.728324  | -1.996711 | -0.701772 |
| H | 5.498633  | -0.417955 | -0.880582 |
| H | 3.735815  | -1.509157 | 2.101935  |
| H | 2.161003  | -0.868954 | 1.615468  |
| H | 2.845432  | -2.264545 | 0.780049  |
| H | 4.809761  | 0.581645  | 1.821960  |
| H | 4.625791  | 1.501754  | 0.327311  |
| H | 3.249079  | 1.302791  | 1.417245  |

c4Py

|   |           |           |           |
|---|-----------|-----------|-----------|
| C | -1.772141 | 2.910469  | 0.011561  |
| C | -2.732345 | 1.921205  | 0.175703  |
| C | -2.395114 | 0.584660  | -0.131619 |
| C | -1.096901 | 0.263416  | -0.596144 |
| C | -0.146264 | 1.284324  | -0.744334 |
| C | -0.506870 | 2.589921  | -0.440304 |
| C | -3.382161 | -0.443881 | 0.031445  |
| C | -3.068234 | -1.784274 | -0.272209 |
| C | -1.741667 | -2.083254 | -0.751677 |
| C | -0.817486 | -1.125284 | -0.902931 |
| C | -4.064770 | 2.222616  | 0.648276  |
| C | -4.981542 | 1.260133  | 0.800681  |
| C | -4.675395 | -0.119180 | 0.497007  |
| C | -5.616997 | -1.131390 | 0.648883  |
| C | -5.299617 | -2.445047 | 0.348480  |
| C | -4.036016 | -2.770866 | -0.108899 |
| C | 1.276116  | 1.011581  | -1.193074 |
| C | 2.174247  | 0.537998  | -0.039977 |
| C | 3.616417  | 0.271542  | -0.496397 |
| C | 4.454830  | -0.176881 | 0.696749  |
| N | 5.917600  | -0.484232 | 0.423042  |
| C | 6.636148  | 0.721558  | -0.089870 |
| C | 6.546365  | -0.900460 | 1.715371  |
| C | 6.060307  | -1.602295 | -0.558146 |
| H | 0.216406  | 3.377474  | -0.565284 |
| H | -2.018304 | 3.933424  | 0.234122  |
| H | -4.303318 | 3.246419  | 0.874964  |
| H | -5.969588 | 1.497396  | 1.152617  |
| H | -6.602492 | -0.885993 | 1.002797  |
| H | -6.040000 | -3.214654 | 0.470054  |
| H | -3.795765 | -3.792840 | -0.343451 |
| H | -1.507109 | -3.104615 | -0.995408 |
| H | 0.153061  | -1.395103 | -1.274123 |
| H | 1.297439  | 0.281791  | -1.995760 |
| H | 1.691363  | 1.925159  | -1.607398 |
| H | 2.171072  | 1.294042  | 0.740171  |
| H | 1.757542  | -0.362841 | 0.399974  |
| H | 3.608016  | -0.489210 | -1.269412 |
| H | 4.021688  | 1.177382  | -0.933942 |
| H | 4.456336  | 0.587016  | 1.462118  |
| H | 4.043087  | -1.079755 | 1.126477  |
| H | 7.588591  | -1.124692 | 1.546002  |
| H | 6.456874  | -0.094622 | 2.427764  |
| H | 6.039734  | -1.777253 | 2.088804  |
| H | 7.687255  | 0.489823  | -0.173878 |
| H | 6.248454  | 0.990404  | -1.058097 |
| H | 6.495975  | 1.536906  | 0.603858  |
| H | 7.106131  | -1.855269 | -0.646699 |
| H | 5.506457  | -2.457466 | -0.200871 |
| H | 5.682440  | -1.292966 | -1.518144 |

MODEL1: Mepy plus array of charges reproducing the of the TAA group in c1Py

array of charges at C1M configuration with best ESP fitting charge from g98

| atom | x         | y         | z         |
|------|-----------|-----------|-----------|
| C    | -0.277522 | -0.487588 | -1.601967 |
| C    | -0.277522 | -0.487588 | -0.154226 |
| C    | 0.970920  | -0.487588 | 0.507404  |
| C    | 2.190422  | -0.487328 | -0.248130 |
| C    | 2.149961  | -0.487242 | -1.657847 |
| C    | 0.861676  | -0.487398 | -2.307225 |
| C    | 3.437528  | -0.487308 | 0.416197  |
| C    | 4.607481  | -0.487034 | -0.335043 |
| C    | 4.558835  | -0.486844 | -1.719070 |
| C    | 3.342728  | -0.486925 | -2.376453 |
| C    | 1.028613  | -0.487780 | 1.918666  |
| C    | 2.319939  | -0.487732 | 2.569040  |
| C    | 3.456025  | -0.487510 | 1.862191  |
| C    | -1.463546 | -0.487907 | 0.595635  |
| C    | -1.377465 | -0.487941 | 1.979668  |
| C    | -0.158815 | -0.487957 | 2.635048  |
| C    | -2.822077 | -0.487830 | -0.069020 |
| H    | -2.962390 | 0.387784  | -0.695740 |
| H    | -2.282805 | -0.488283 | 2.560774  |
| H    | -0.131140 | -0.488145 | 3.710692  |
| H    | 2.345944  | -0.487912 | 3.644616  |
| H    | 4.410002  | -0.487476 | 2.359375  |
| H    | 5.558213  | -0.487018 | 0.168599  |
| H    | 5.472967  | -0.486632 | -2.285415 |
| H    | 3.311786  | -0.486858 | -3.451893 |
| H    | 0.833418  | -0.487461 | -3.382766 |
| H    | -1.217281 | -0.487801 | -2.120421 |
| H    | -2.962883 | -1.363914 | -0.694979 |
| H    | -3.609043 | -0.487281 | 0.675202  |

| charge/a.u. | x         | y        | z         |
|-------------|-----------|----------|-----------|
| 0.190954    | -3.449915 | 0.924588 | -0.251609 |
| -0.394123   | -3.669232 | 1.591484 | 1.088303  |
| -0.275069   | -2.563595 | 1.813049 | -1.097294 |
| -0.467986   | -4.787245 | 0.756554 | -0.939768 |
| 0.209070    | -5.236239 | 1.729307 | -1.070276 |
| 0.202492    | -4.629385 | 0.290660 | -1.900197 |
| 0.201054    | -5.421176 | 0.135891 | -0.325186 |
| 0.163871    | -3.026674 | 2.785487 | -1.168090 |
| 0.148249    | -1.598035 | 1.884852 | -0.627162 |
| 0.149410    | -2.467075 | 1.378590 | -2.078666 |
| 0.187756    | -4.141905 | 2.546889 | 0.918860  |
| 0.188313    | -4.310304 | 0.964610 | 1.688996  |
| 0.185155    | -2.715841 | 1.723367 | 1.569670  |

MODEL4 MePy plus field generated by TAA in the C4Py salt

| atom | x        | y         | z         |
|------|----------|-----------|-----------|
| C    | 0.000000 | 0.000000  | 0.000000  |
| C    | 0.000000 | 0.000000  | 1.392539  |
| C    | 1.228367 | 0.000000  | 2.085350  |
| C    | 2.441001 | -0.000026 | 1.359935  |
| C    | 2.401268 | -0.000021 | -0.029842 |
| C    | 1.190626 | -0.000010 | -0.702408 |
| C    | 3.689102 | -0.000063 | 2.090337  |
| C    | 3.708249 | -0.000101 | 3.428238  |
| C    | 2.484766 | -0.000078 | 4.198657  |
| C    | 1.246230 | -0.000017 | 3.519804  |
| C    | 0.035199 | -0.000017 | 4.247737  |

|   |           |           |           |
|---|-----------|-----------|-----------|
| C | 0.065396  | -0.000030 | 5.650512  |
| C | 1.295350  | -0.000118 | 6.291095  |
| C | 2.485601  | -0.000140 | 5.585557  |
| C | -1.221054 | 0.000041  | 2.160884  |
| C | -1.204846 | 0.000026  | 3.500661  |
| C | -1.205067 | 0.000014  | 6.471048  |
| H | 1.325812  | -0.000141 | 7.366452  |
| H | 3.421266  | -0.000190 | 6.116875  |
| H | 4.642954  | -0.000138 | 3.961031  |
| H | 4.607285  | -0.000069 | 1.529798  |
| H | 3.323274  | -0.000031 | -0.584324 |
| H | 1.177293  | -0.000010 | -1.777679 |
| H | -0.937167 | 0.000008  | -0.528440 |
| H | -2.156917 | 0.000124  | 1.630091  |
| H | -2.133902 | 0.000102  | 4.038092  |
| H | -1.813822 | -0.876122 | 6.268582  |
| H | -0.973819 | 0.000598  | 7.529209  |
| H | -1.814353 | 0.875577  | 6.267747  |

| charge/a.u. | x         | y        | z         |
|-------------|-----------|----------|-----------|
| 0.248285    | -4.902790 | 3.009028 | 8.385566  |
| -0.328743   | -6.037805 | 2.247886 | 7.780948  |
| -0.475473   | -4.712456 | 2.574719 | 9.802771  |
| -0.370908   | -5.245630 | 4.465409 | 8.374869  |
| 0.212870    | -6.150415 | 4.620345 | 8.942814  |
| 0.205020    | -4.435140 | 5.022680 | 8.819212  |
| 0.204122    | -5.394620 | 4.786078 | 7.355130  |
| 0.168461    | -5.604222 | 2.814371 | 10.362149 |
| 0.166656    | -4.541215 | 1.511905 | 9.836661  |
| 0.180756    | -3.866520 | 3.098983 | 10.221387 |
| 0.178120    | -6.941735 | 2.484303 | 8.321877  |
| 0.190247    | -6.144746 | 2.537437 | 6.746329  |
| 0.179438    | -5.843318 | 1.190776 | 7.849909  |
